# Supplementary material for: Stereochemical optimization of N ,2-substituted cycloalkylamines as norepinephrine reuptake inhibitors
Source: Royal Society of Chemistry journal article supplement (doi:10.1039/d4md00521j), 2024-01-01
Supplement: d4md00521j1.pdf [file d4md00521j1.pdf]

## Supplementary Information

# Stereochemical optimization of *N*,2-substituted cycloalkylamines as norepinephrine reuptake inhibitors

Majlen A. Dilweg<sup>a†</sup>, Tamara A. M. Mocking<sup>a†</sup>, Pantelis Maragkoudakis<sup>a</sup>, Gerard J. P. van Westen<sup>a</sup>, Laura H. Heitman<sup>a,b</sup>,  
Adriaan P. IJzerman<sup>a</sup>, Willem Jespers<sup>a</sup>, Daan van der Es<sup>a\*</sup>

<sup>a</sup>Division of Medicinal Chemistry, Leiden Academic Centre for Drug Research, Leiden University, Einsteinweg 55, 2333 CC Leiden, The Netherlands

<sup>b</sup>Oncode Institute, 2333 CC Leiden, The Netherlands

<sup>†</sup>These authors contributed equally.

\*Corresponding author, email: d.van.der.es@lacdr.leidenuniv.nl

### Contents

|                                 |     |
|---------------------------------|-----|
| Supplementary figures .....     | S2  |
| Supplementary experimental..... | S3  |
| NMR spectra.....                | S5  |
| HPLC spectra .....              | S27 |

Supplementary figures

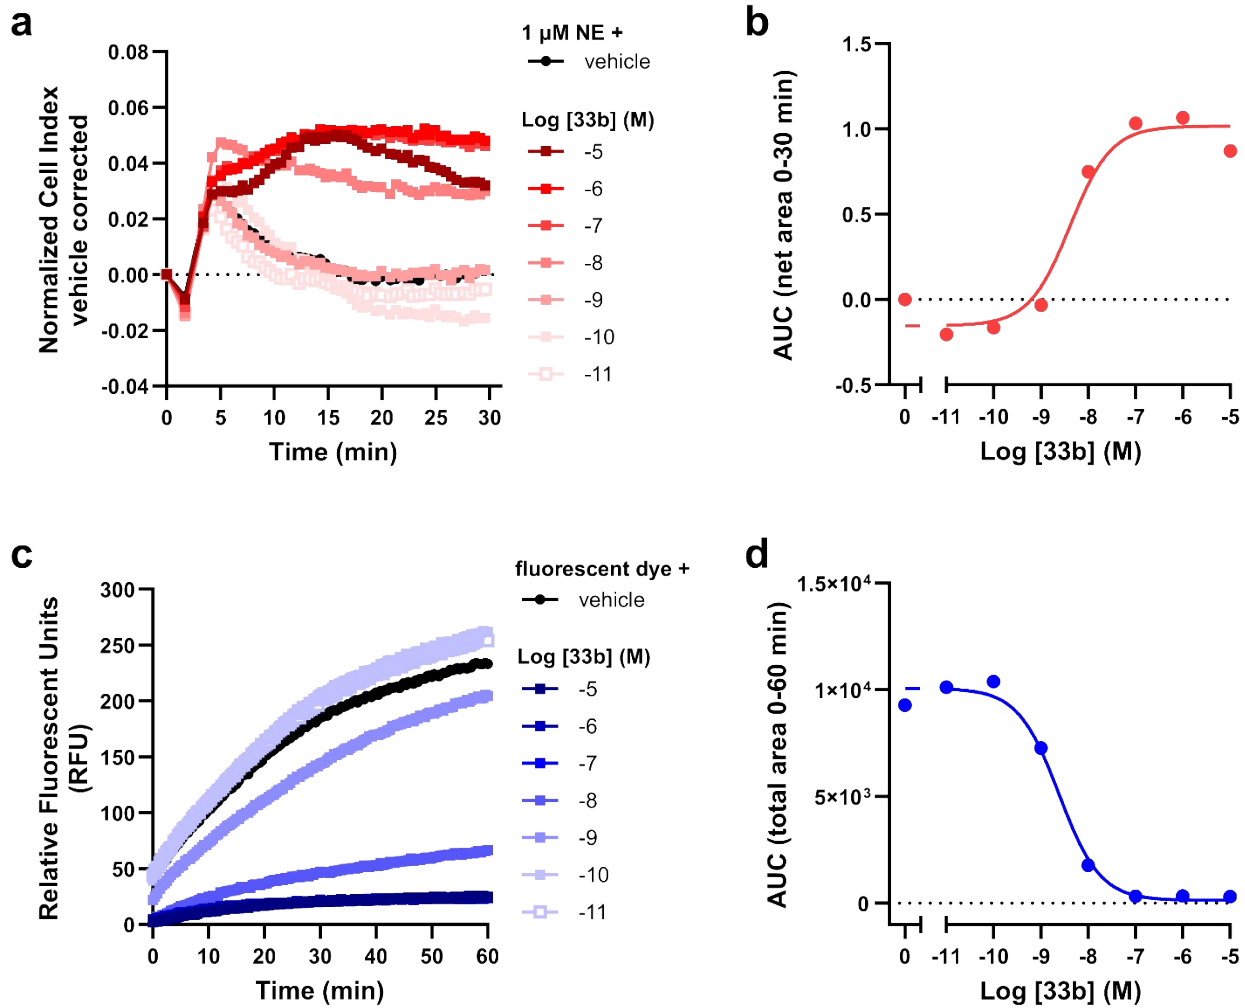

**Figure S1.** Potentiation of substrate-induced cellular response upon pretreatment with **33b** in dox-treated JumpIn-NET cells in the TRACT assay. (a) Representative vehicle-corrected normalized Cell Index traces are shown of dox-treated cells pretreated for 1 h with increasing concentrations of **33b** (red), stimulated with 1  $\mu$ M norepinephrine (NE) in TRACT assay. (b) Representative concentration-inhibition curve of **33b** upon stimulation with NE. Cellular response is expressed as the net AUC of the first 30 minutes after stimulation. Inhibition of fluorescent neurotransmitter-dye uptake in dox-treated JumpIn-NET cells in fluorescent uptake assay (c) Representative neurotransmitter-dye uptake traces corrected for non-NET mediated uptake are shown of dox-treated JumpIn-NET cells pretreated for 1 h with vehicle or increasing concentrations of **33b** (blue), followed by addition of fluorescent loading dye solution and uptake was monitored for 1 h. (d) Representative concentration-inhibition curve of **33b** in fluorescent uptake assay. Cellular response is expressed as the total AUC of the total 1 h after addition of the loading dye.

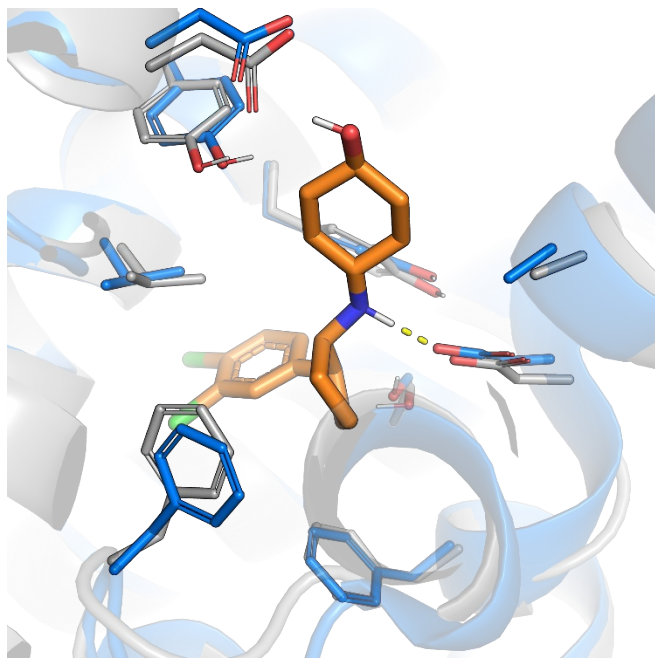

**Figure S2.** Alignment of the hNET AlphaFold model used in this study to dock compound **33b** (grey, compound in orange) aligned with a cryo-EM structure of the outward facing conformation of hNET with atomoxetine (PDB: 8Z1L)<sup>1</sup> in blue. The cryo-EM structure was aligned with PyMOL<sup>2</sup> with a total RMSD of 1.01 Å. Residues in the binding site are shown to closely overlap, validating the use of the AlphaFold model in this study.

- 1 H. Zhang, Y. L. Yin, A. Dai, T. Zhang, C. Zhang, C. Wu, W. Hu, X. He, B. Pan, S. Jin, Q. Yuan, M. W. Wang, D. Yang, H. E. Xu and Y. Jiang, Dimerization and antidepressant recognition at noradrenaline transporter, *Nature*, 2024, **630**, 247–254.
- 2 W. L. DeLano, The PyMOL Molecular Graphics System, Version 2.5.2, Schrödinger, LLC, New York, NY, 2021

## Supplementary experimental

### 1. Fluorescent uptake assay

Fluorescent uptake assays were performed using the fluorescent neurotransmitter transporter uptake assay kit (Molecular devices San Jose, CA, USA) following the supplier's protocol. HEK293-JumpIn-NET cells were seeded (60.000 cells/well) in a poly-D-lysine coated black 96 wells plate and induced with doxycycline (1  $\mu\text{g}/\text{mL}$ ) to express the transporter of interest for 24 hours. After 24 h, medium was removed, and cells were preincubated by addition of 100  $\mu\text{L}/\text{well}$  inhibitor (at increasing concentrations ranging from  $10^{-11}$  to  $10^{-5}$ ), inhibitor control (10  $\mu\text{M}$  nisoxetine) or vehicle control (buffer only) in HBSS containing 20 mM HEPES for 1 h at 37 °C prior to initiation of uptake by addition of 100  $\mu\text{M}$  fluorescent neurotransmitter dye. Uptake of dye was continuously monitored for 1 h at 37 °C on the FlexStation 3 Multi-Mode Microplate Reader (Molecular devices, San Jose, CA, USA). To obtain dose-response curves the total AUC over 60 minutes was calculated from the time traces and corrected for non-NET mediated uptake by subtracting uptake remaining in nisoxetine treated cells.

# NMR spectra

Compound 27; <sup>1</sup>H NMR (CDCl<sub>3</sub>, 400 MHz)

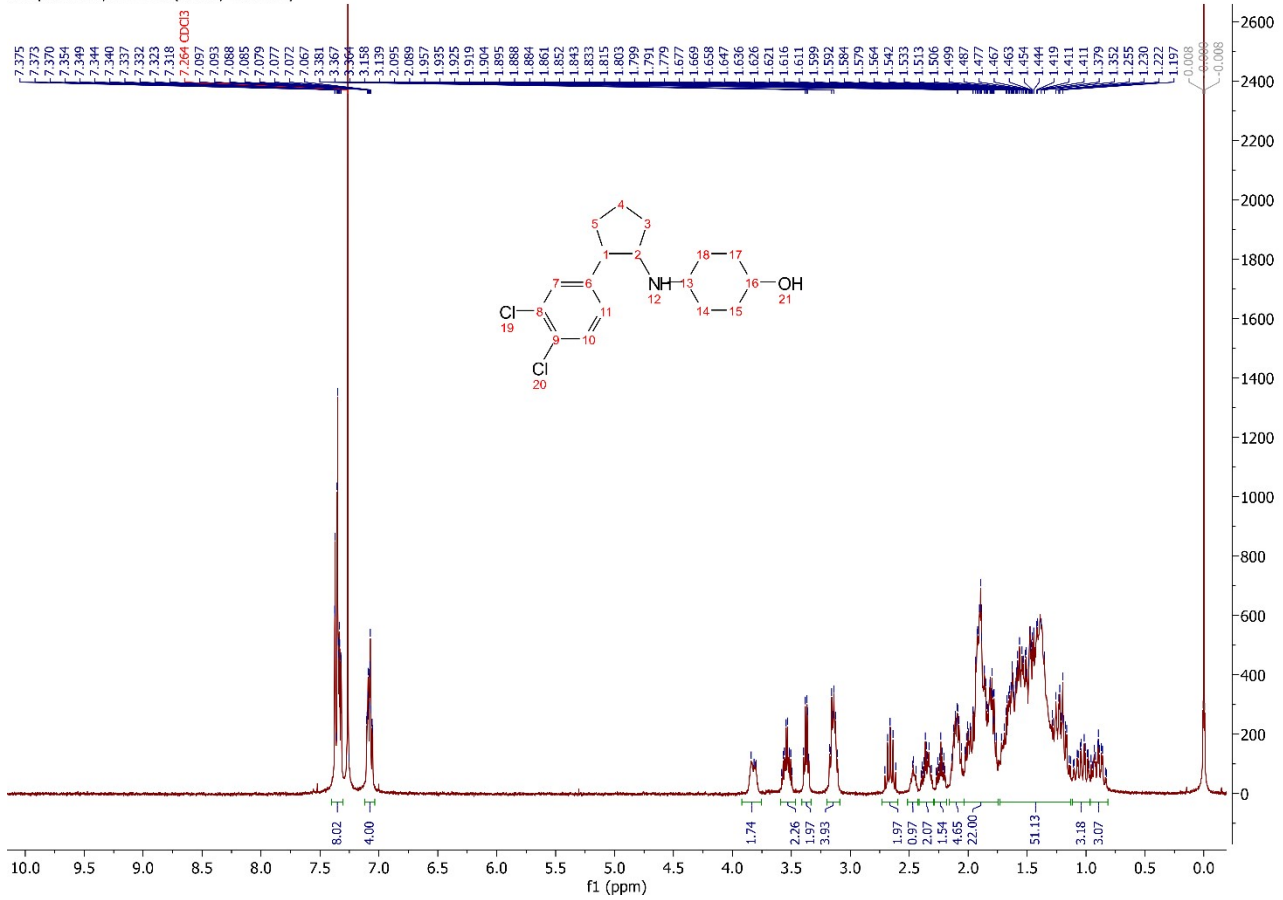

Compound 29; <sup>1</sup>H NMR (CDCl<sub>3</sub>, 400 MHz)

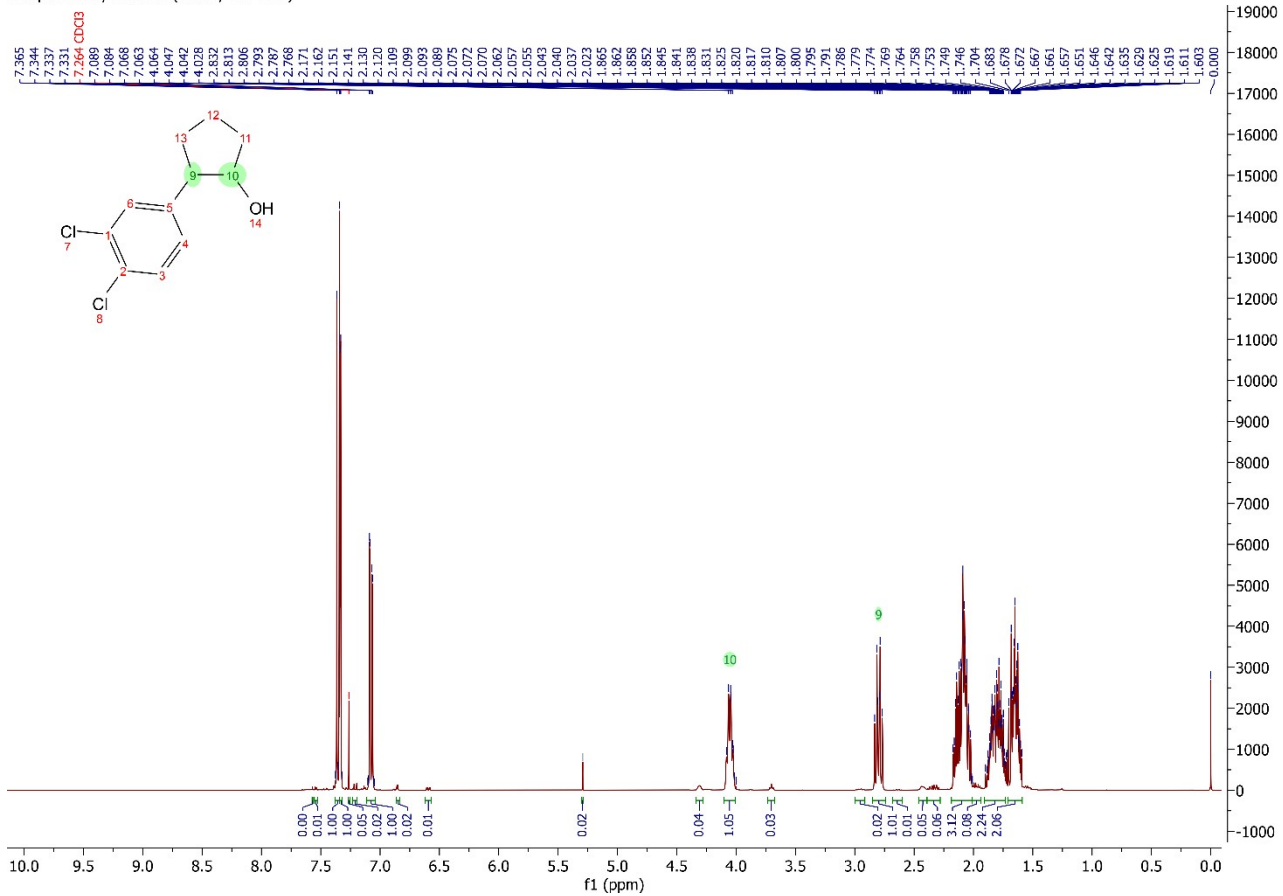

Compound (1S,2R)-29; 1H NMR (CDCl3, 400 MHz)

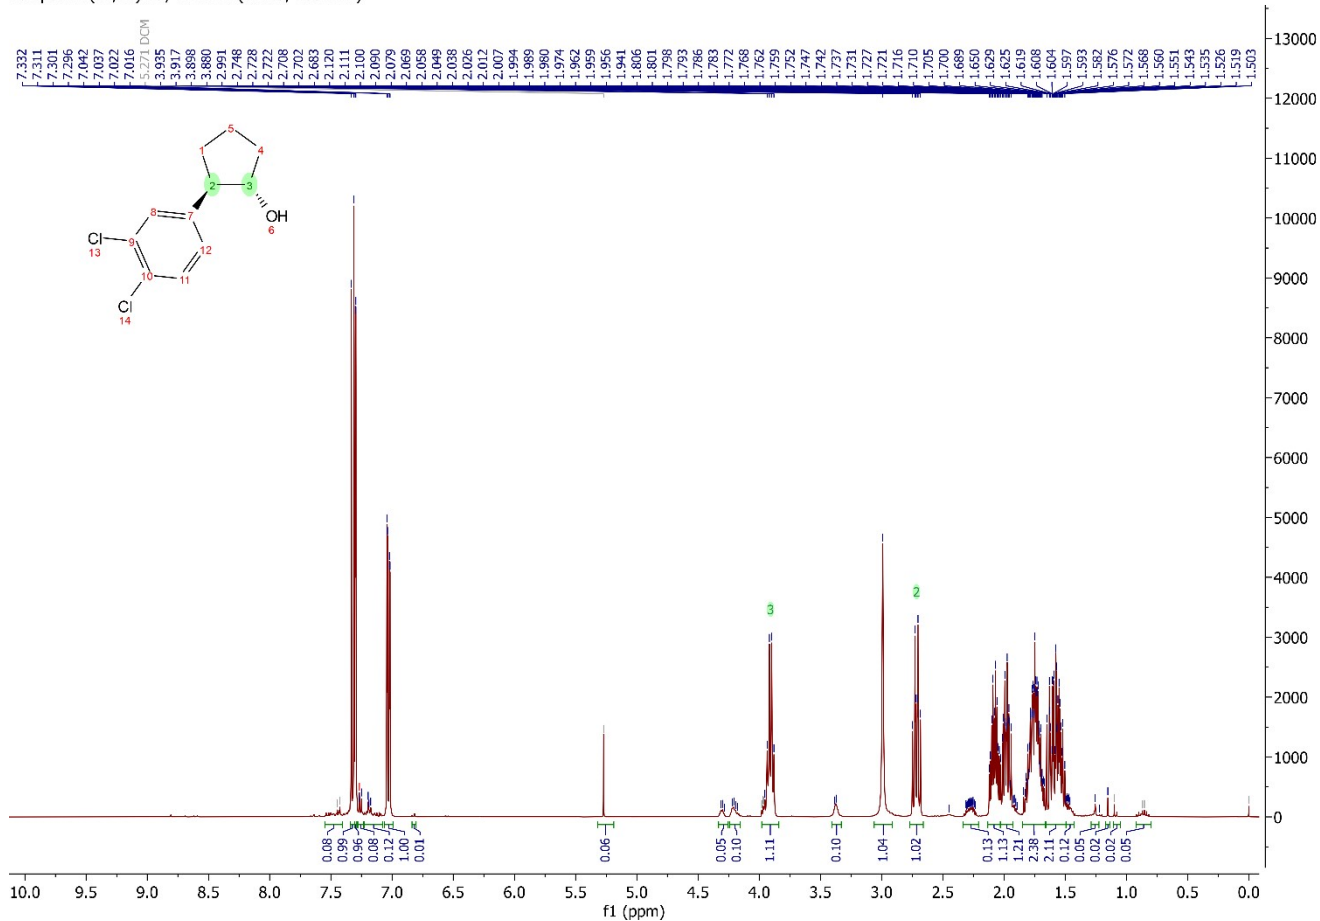

Compound (1R,2S)-29; 1H NMR (CDCl3, 400 MHz)

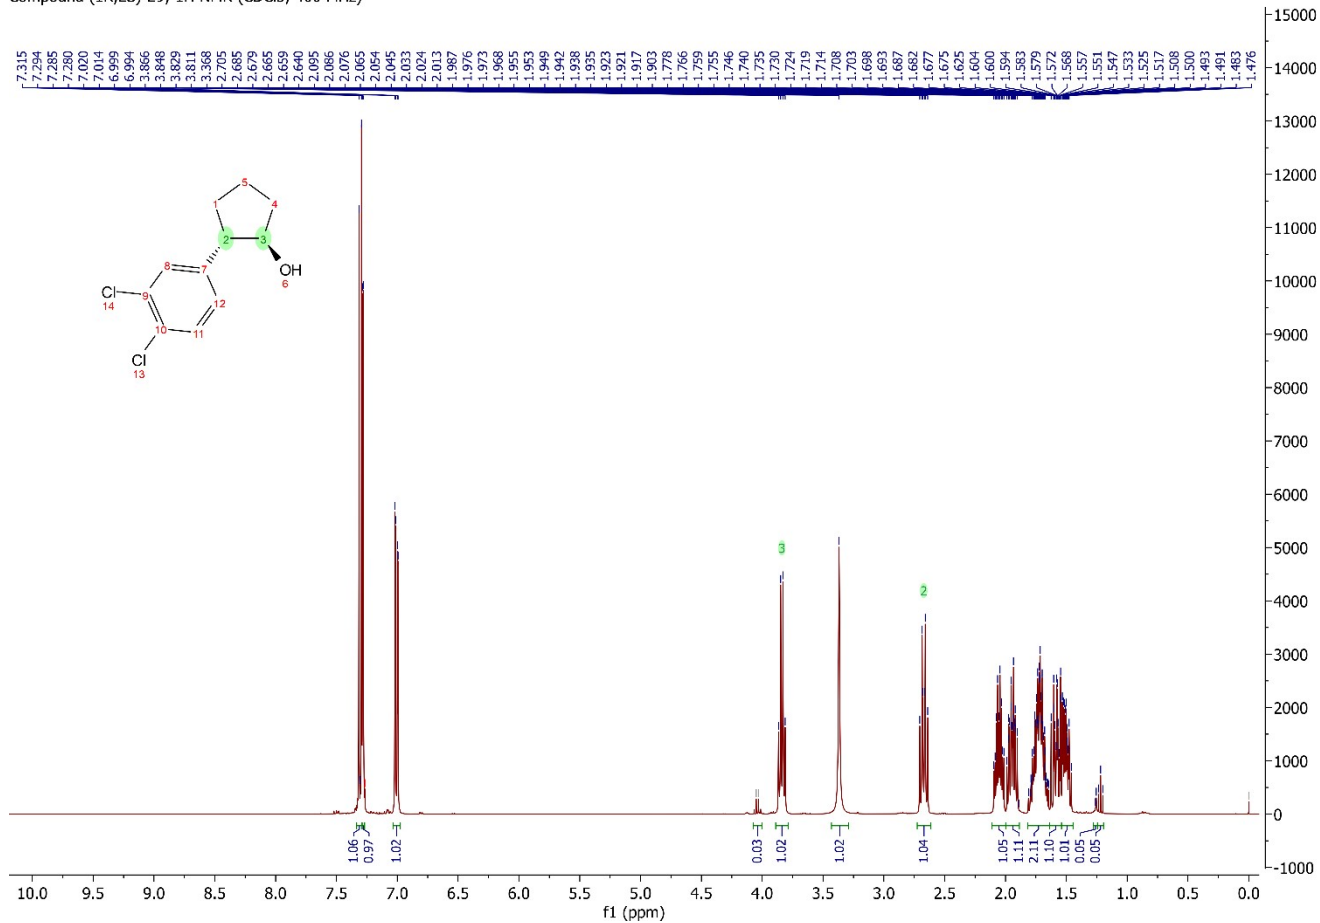

Compound 30; <sup>1</sup>H NMR (CDCl<sub>3</sub>, 400 MHz)

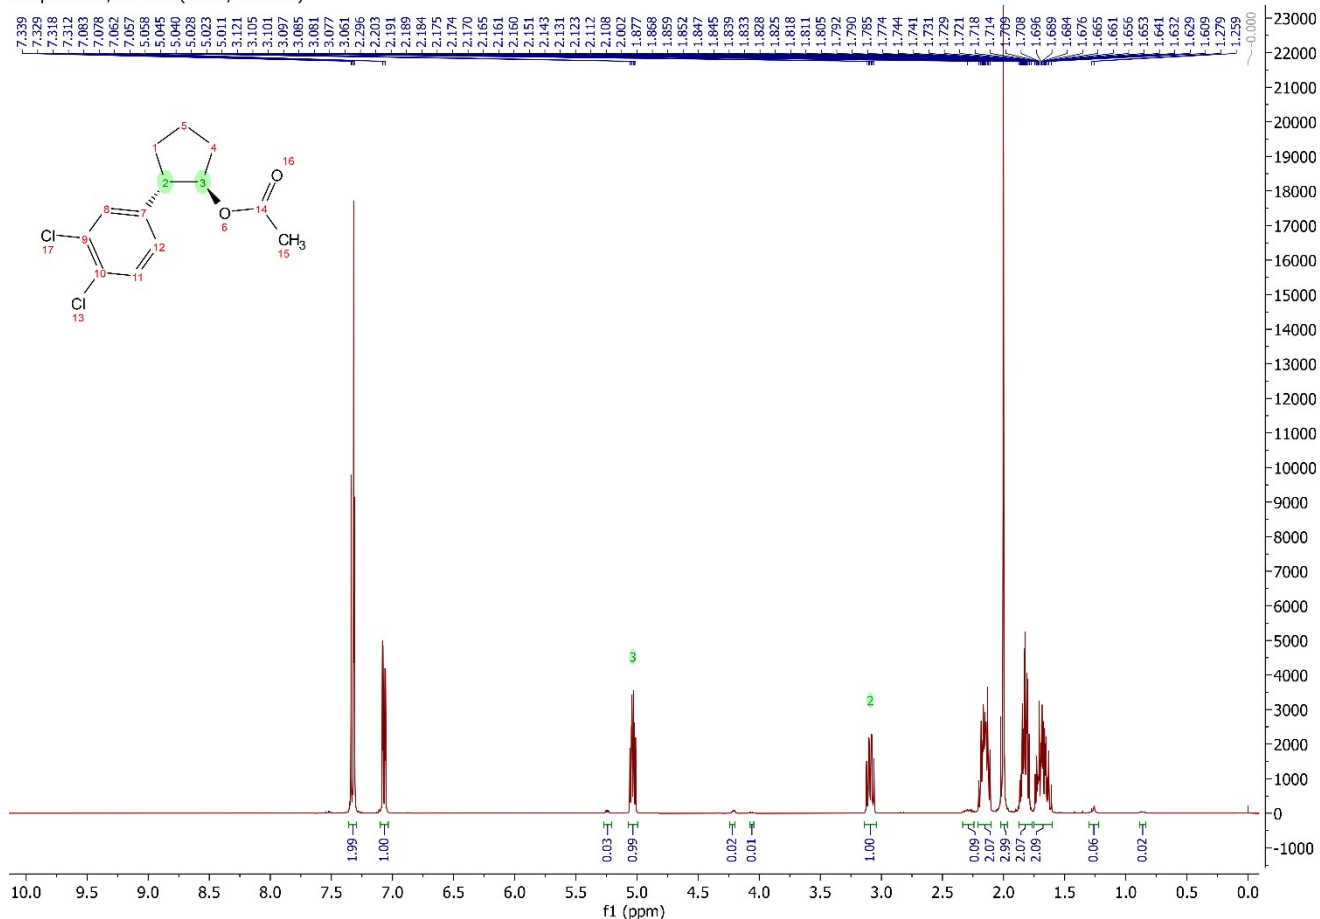

Compound (R)-31; <sup>1</sup>H NMR (CDCl<sub>3</sub>, 400 MHz)

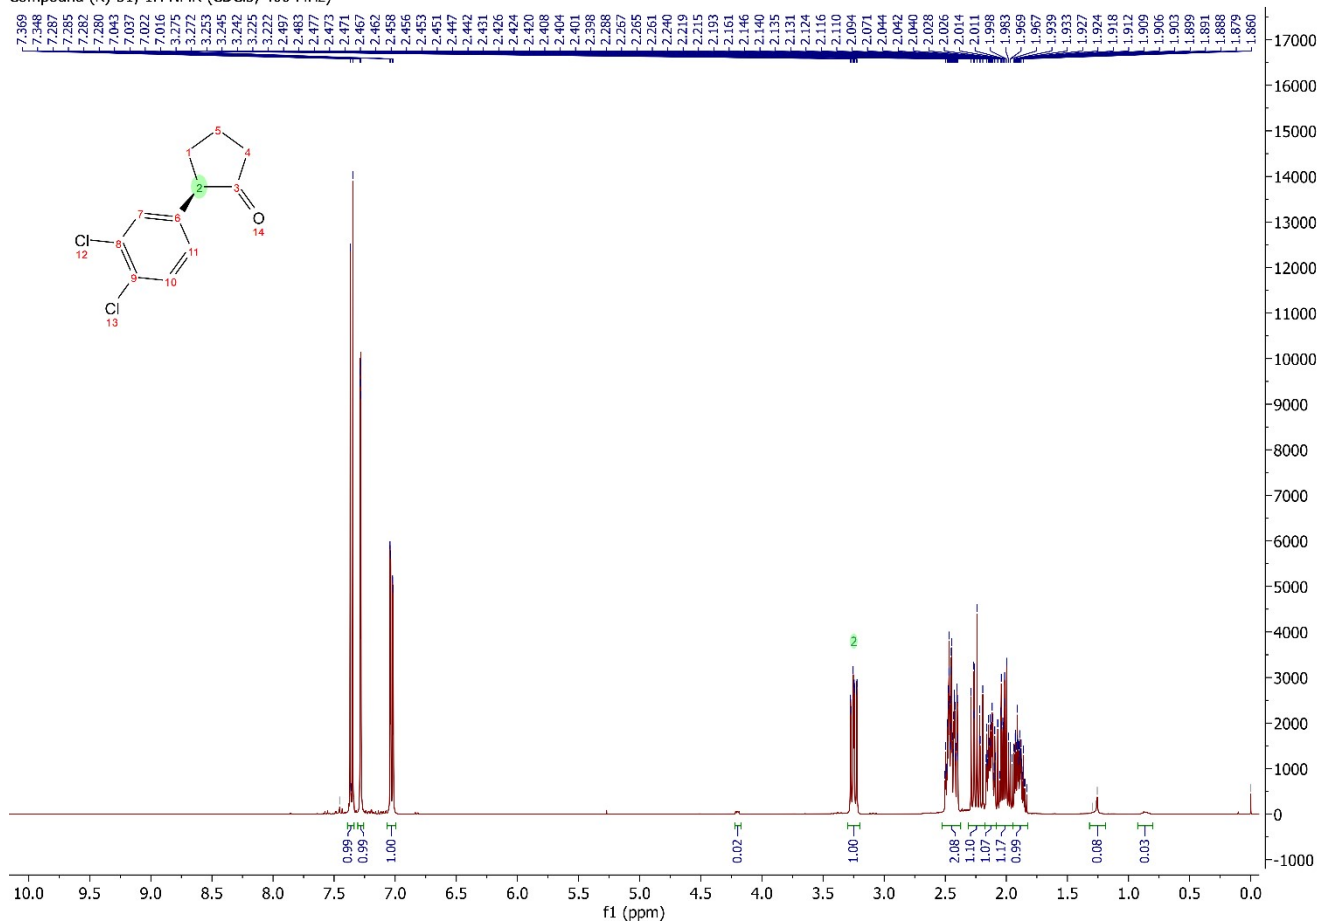

Compound (S)-31

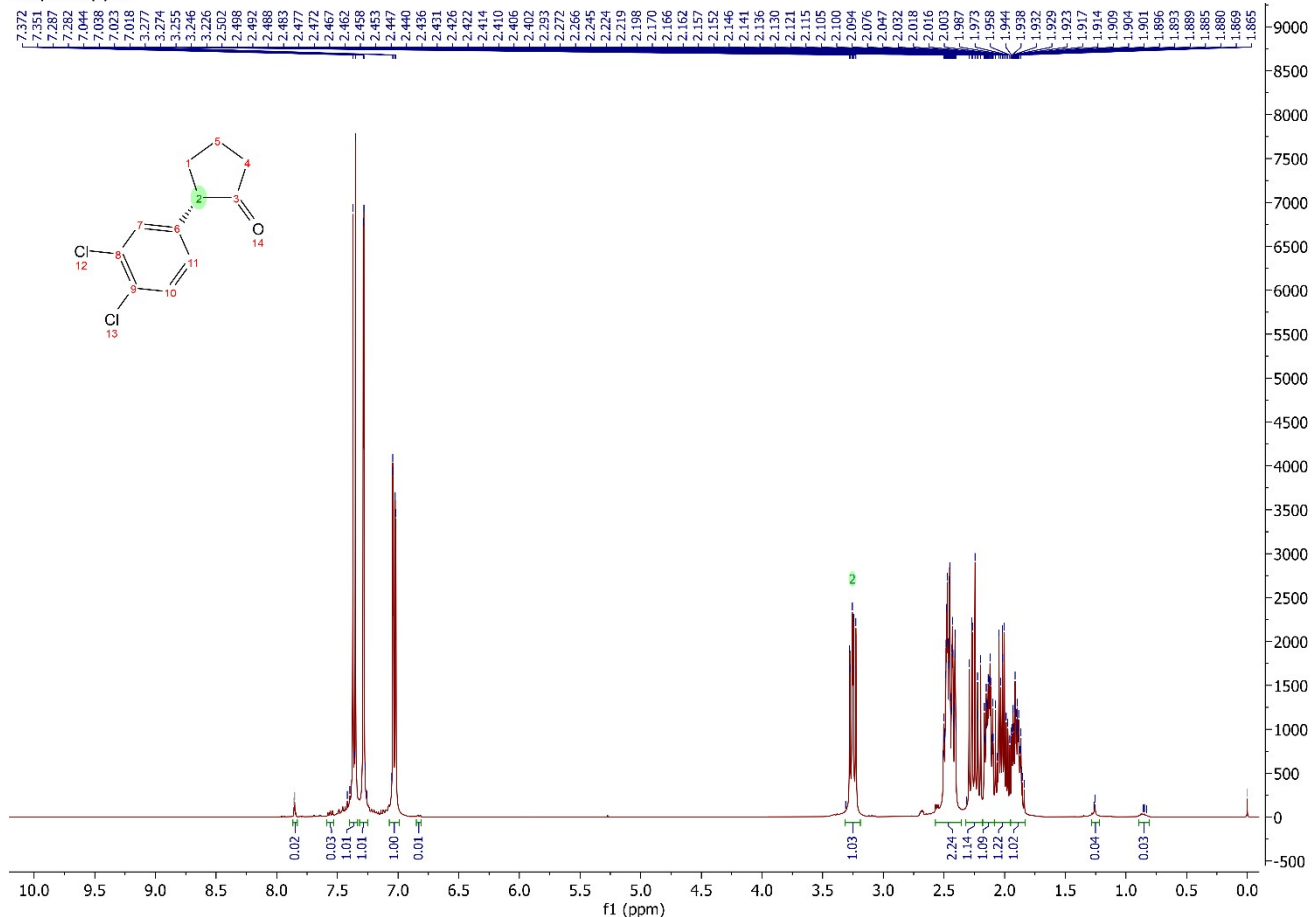

Compound 32a; <sup>1</sup>H NMR (CDCl<sub>3</sub>, 400 MHz)

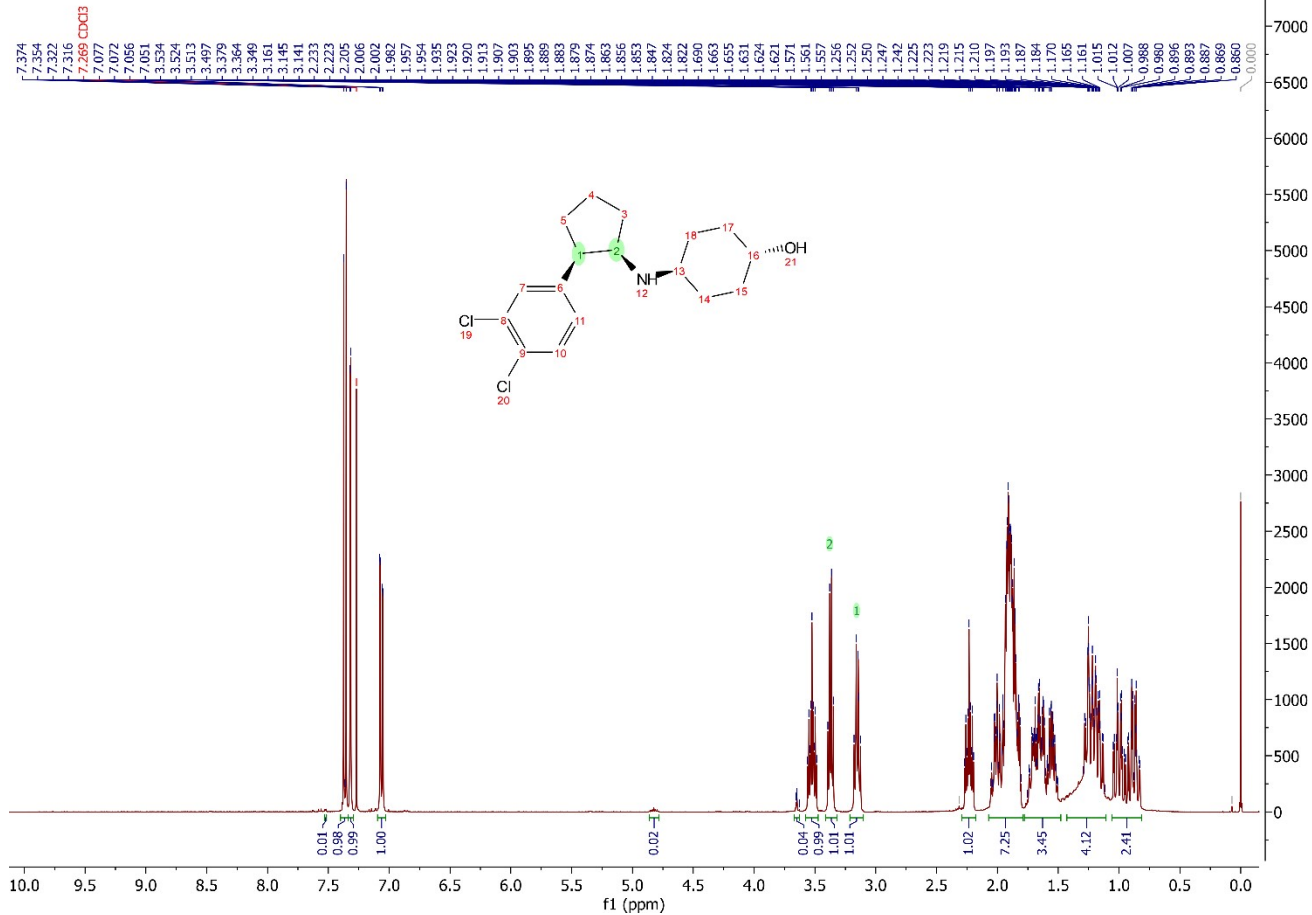



Compound 32a; <sup>13</sup>C NMR (CDCl<sub>3</sub>, 126 MHz)

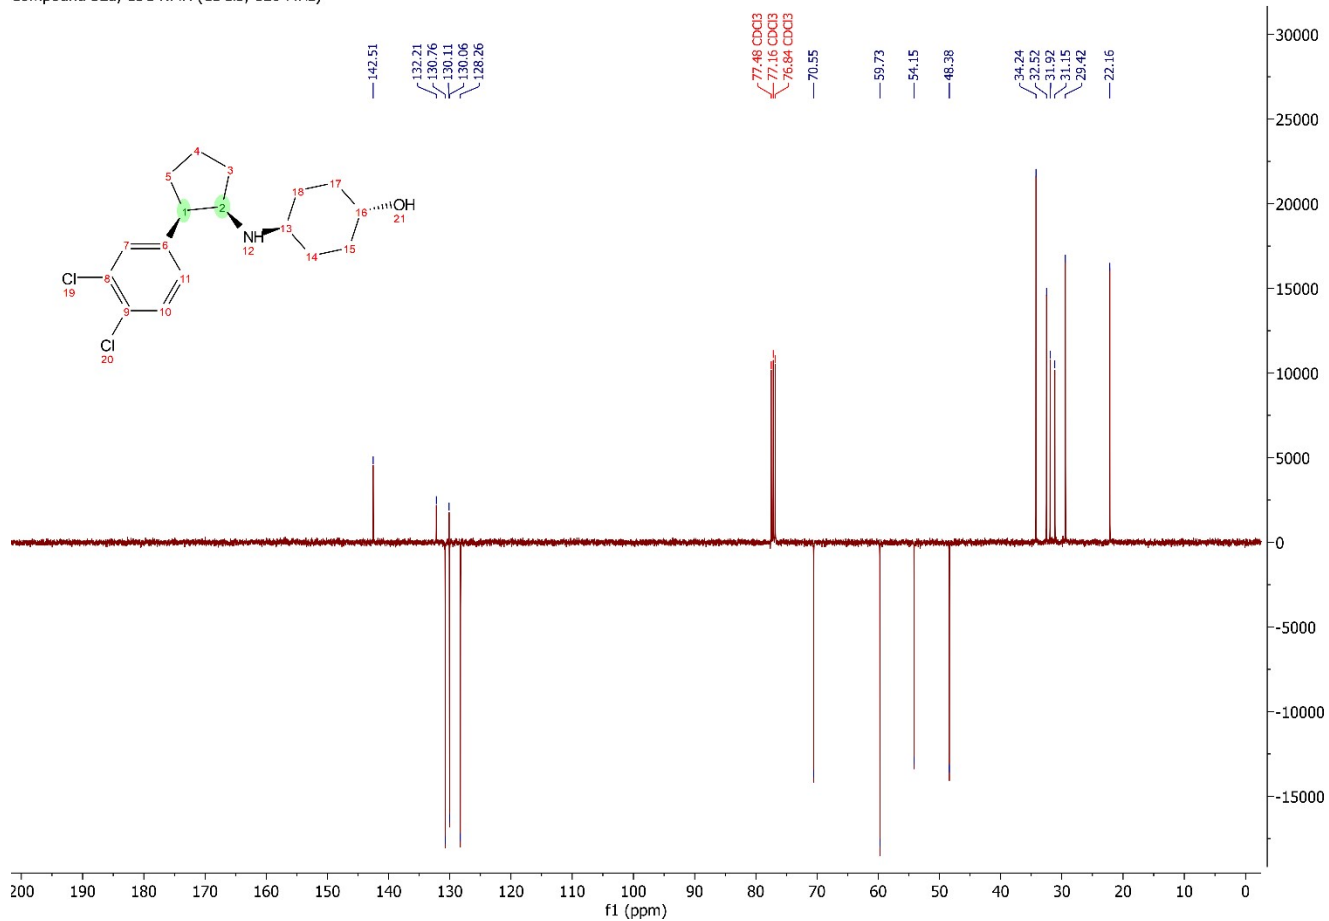

Compound 32a; NOESY (CDCl<sub>3</sub>)

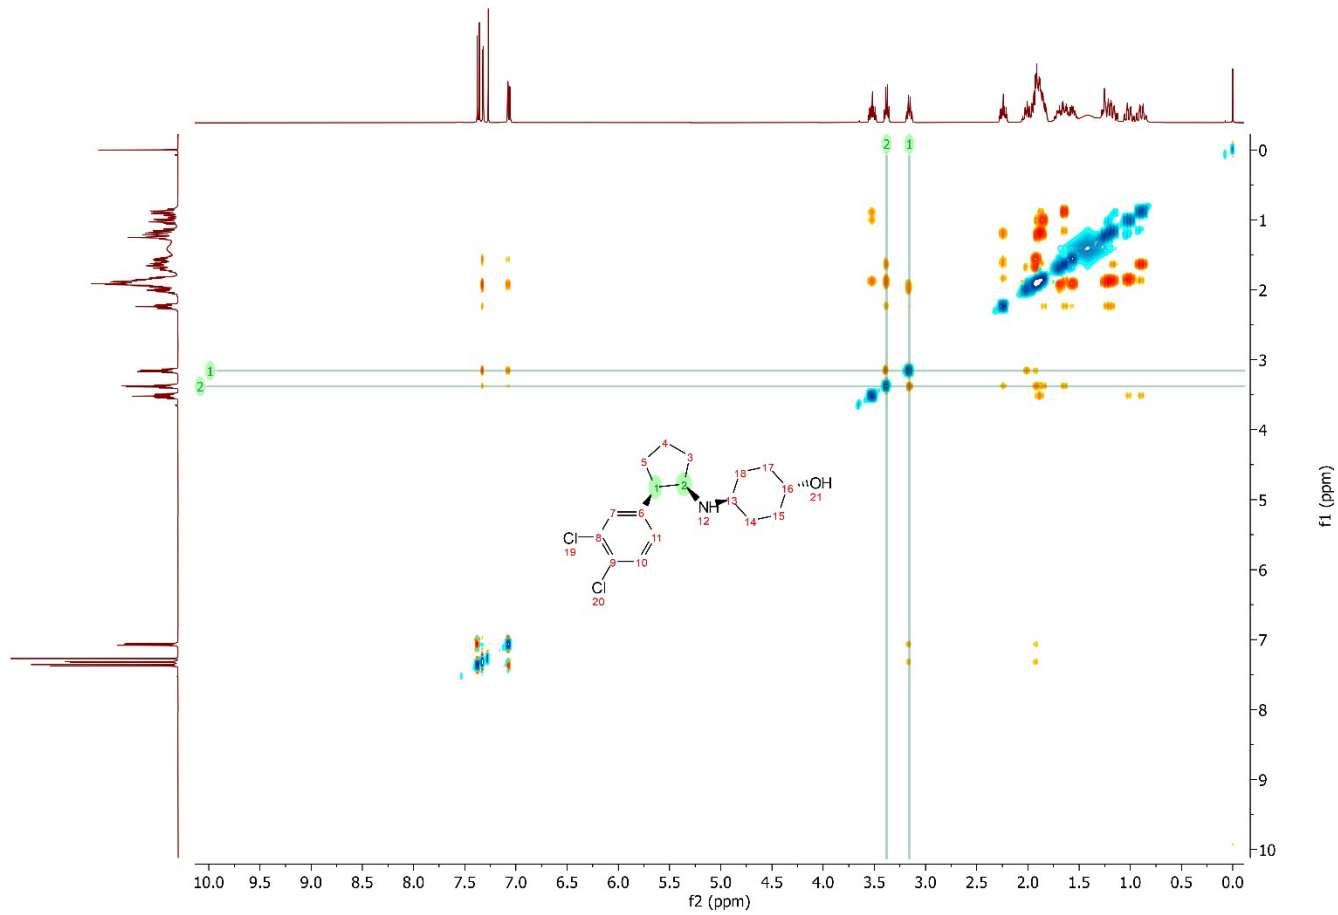

Compound 32b; <sup>1</sup>H NMR (CDCl<sub>3</sub>, 400 MHz)

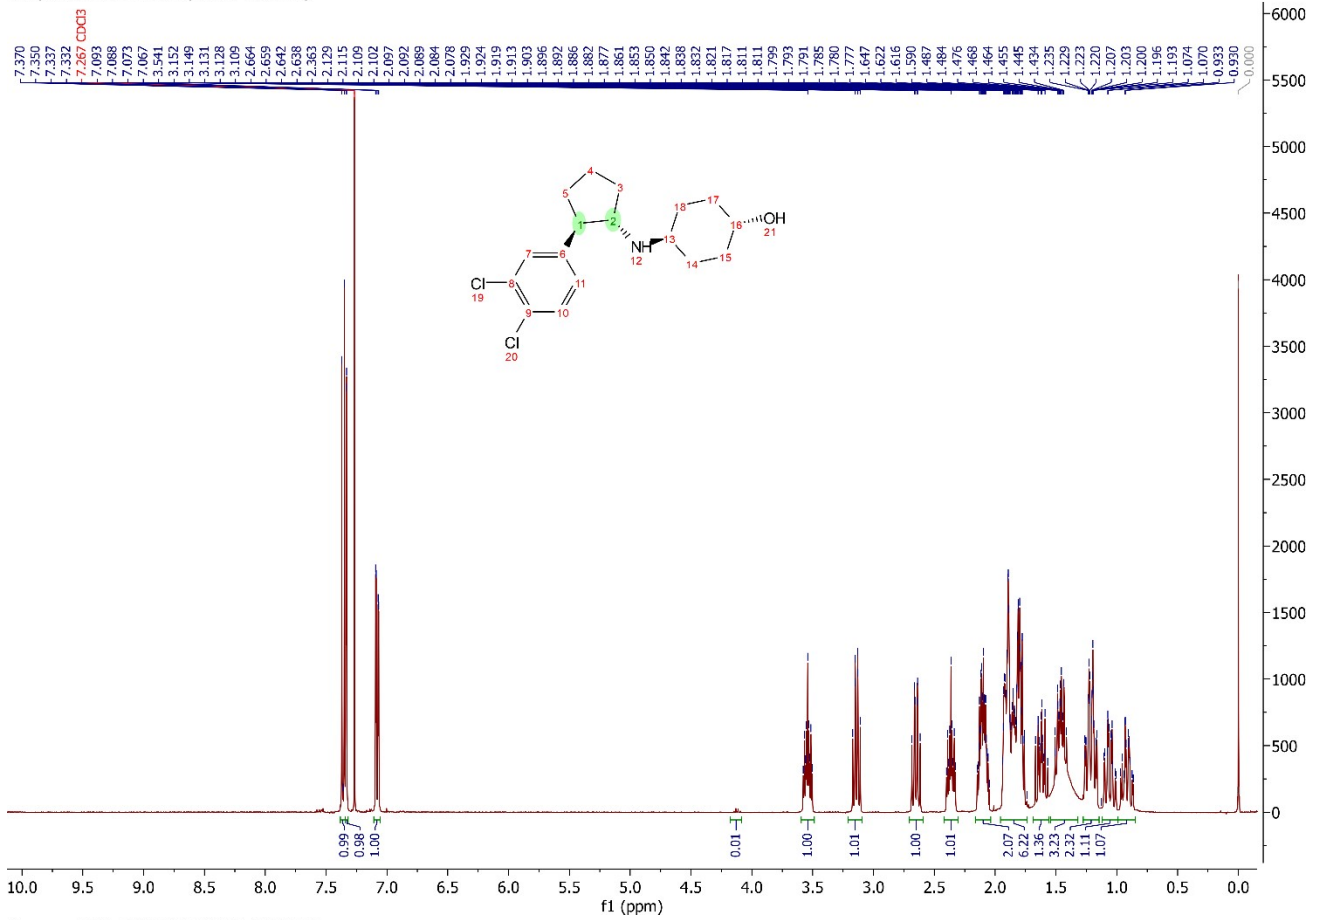

Compound 32b; <sup>13</sup>C NMR (CDCl<sub>3</sub>, 126 MHz)

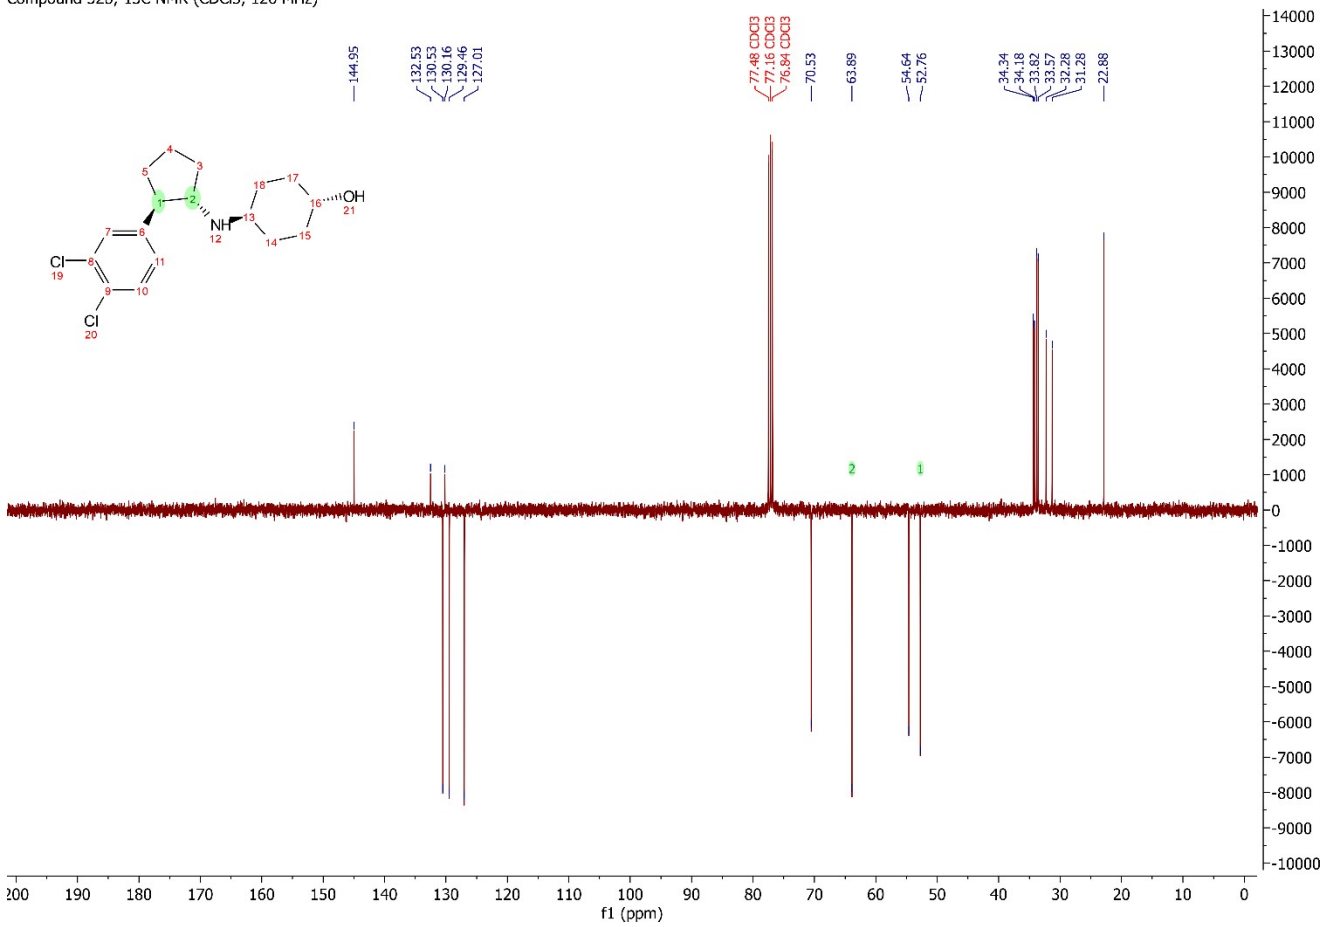

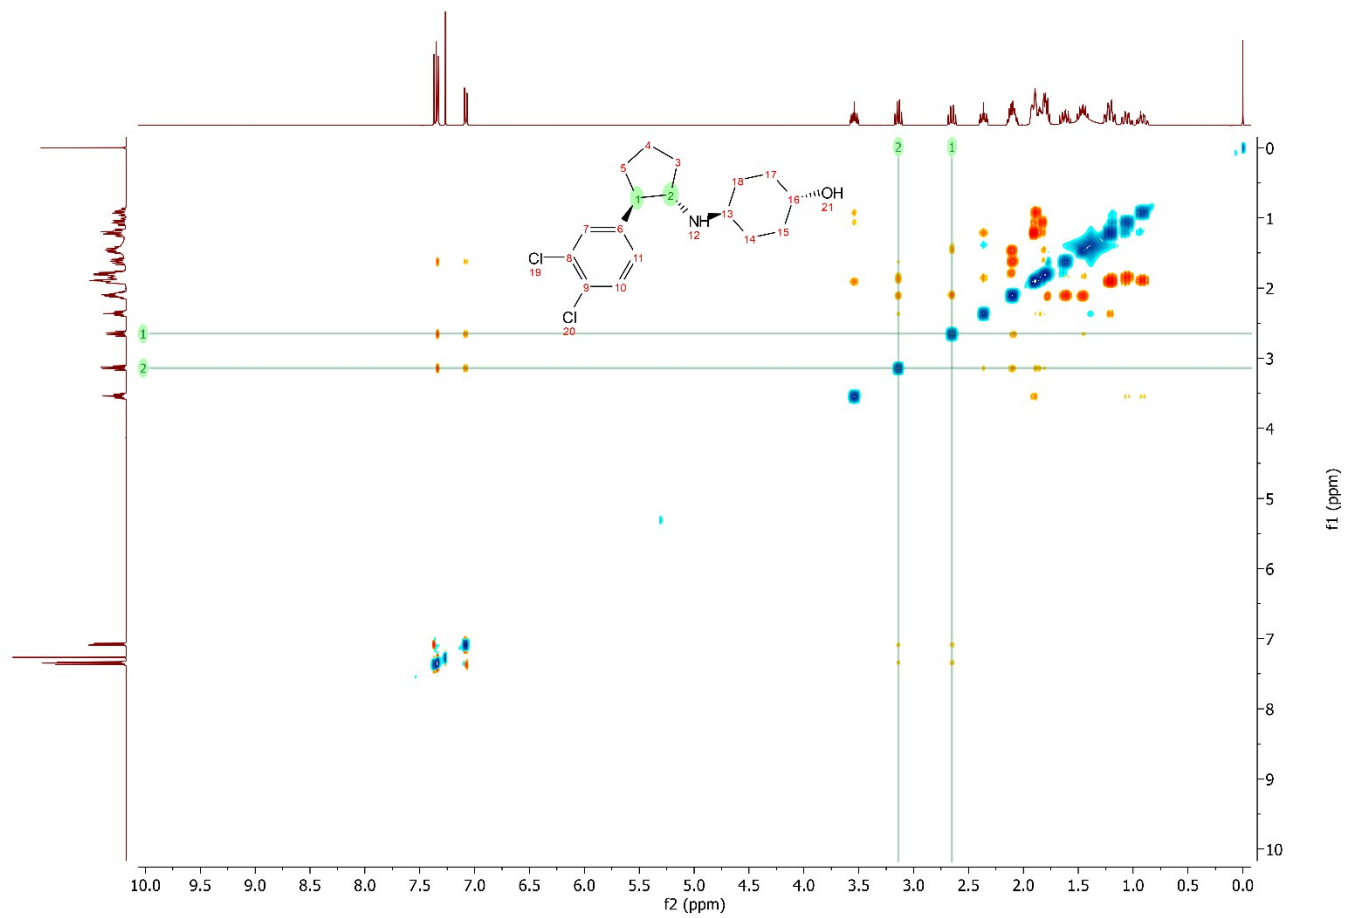

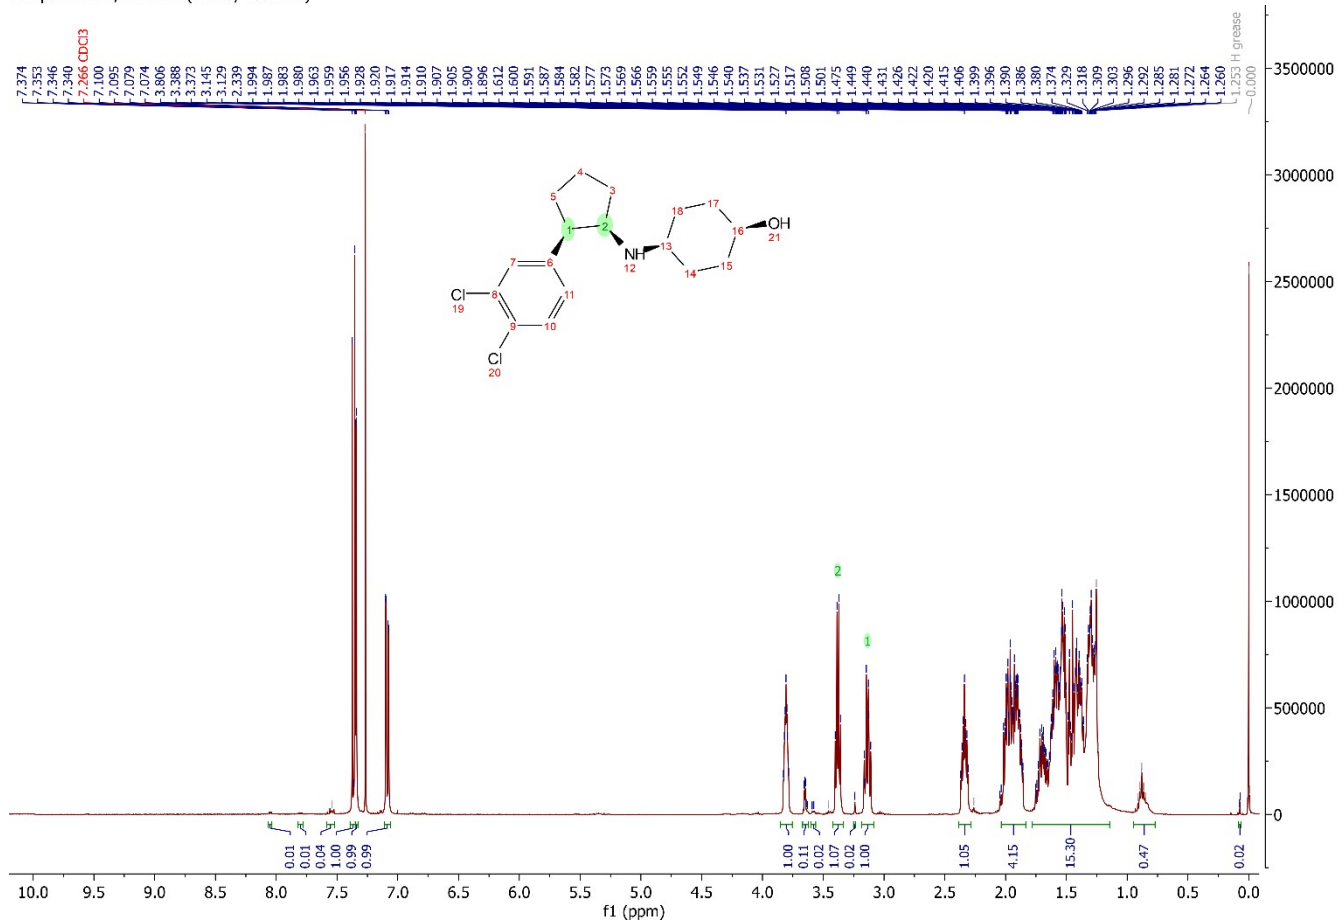

Compound 32c; <sup>13</sup>C NMR (CDCl<sub>3</sub>, 400 MHz)

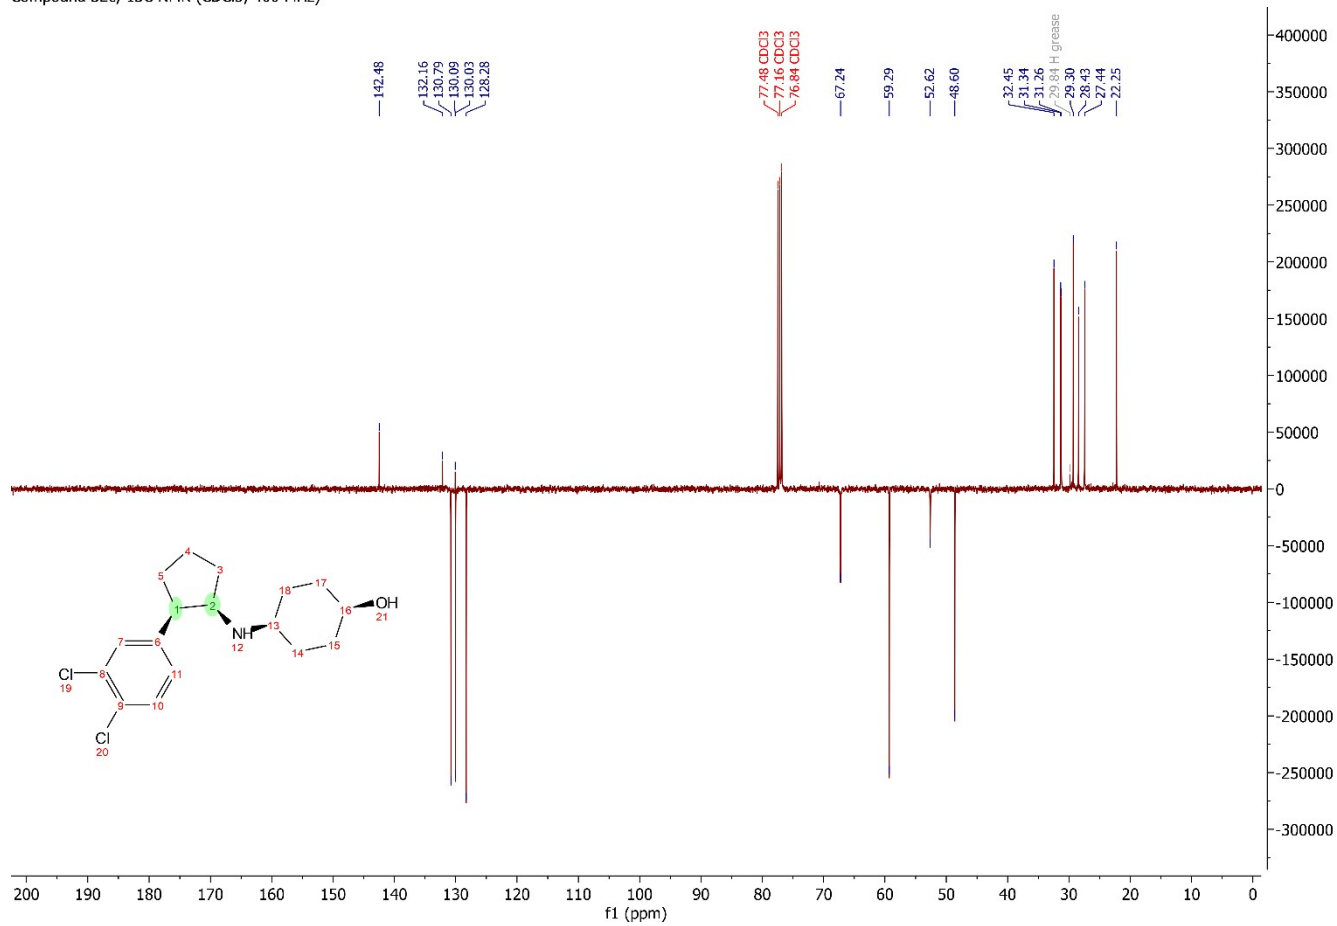

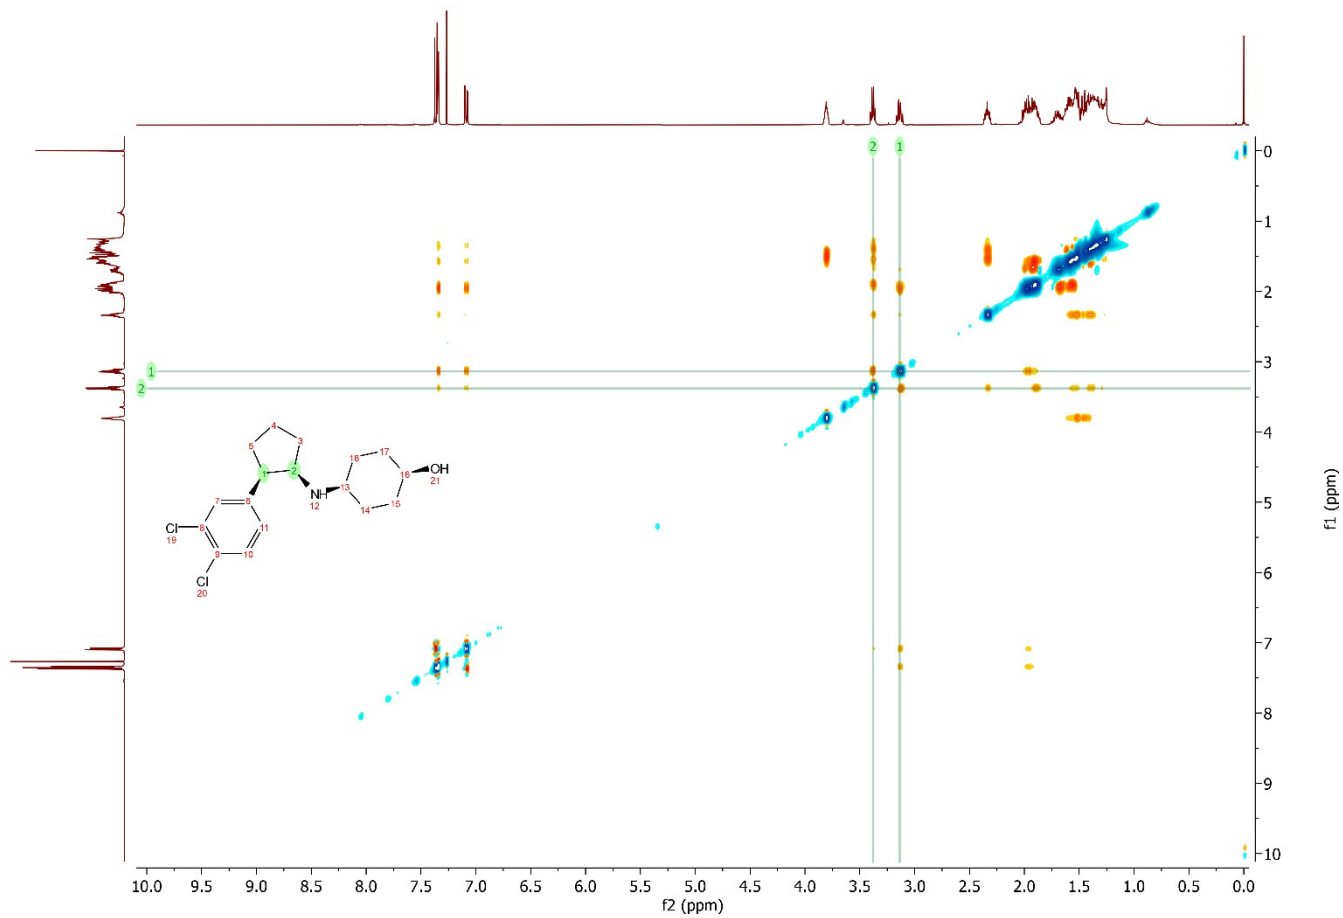

Compound 32d; 1H NMR (CDCl3, 400 MHz)

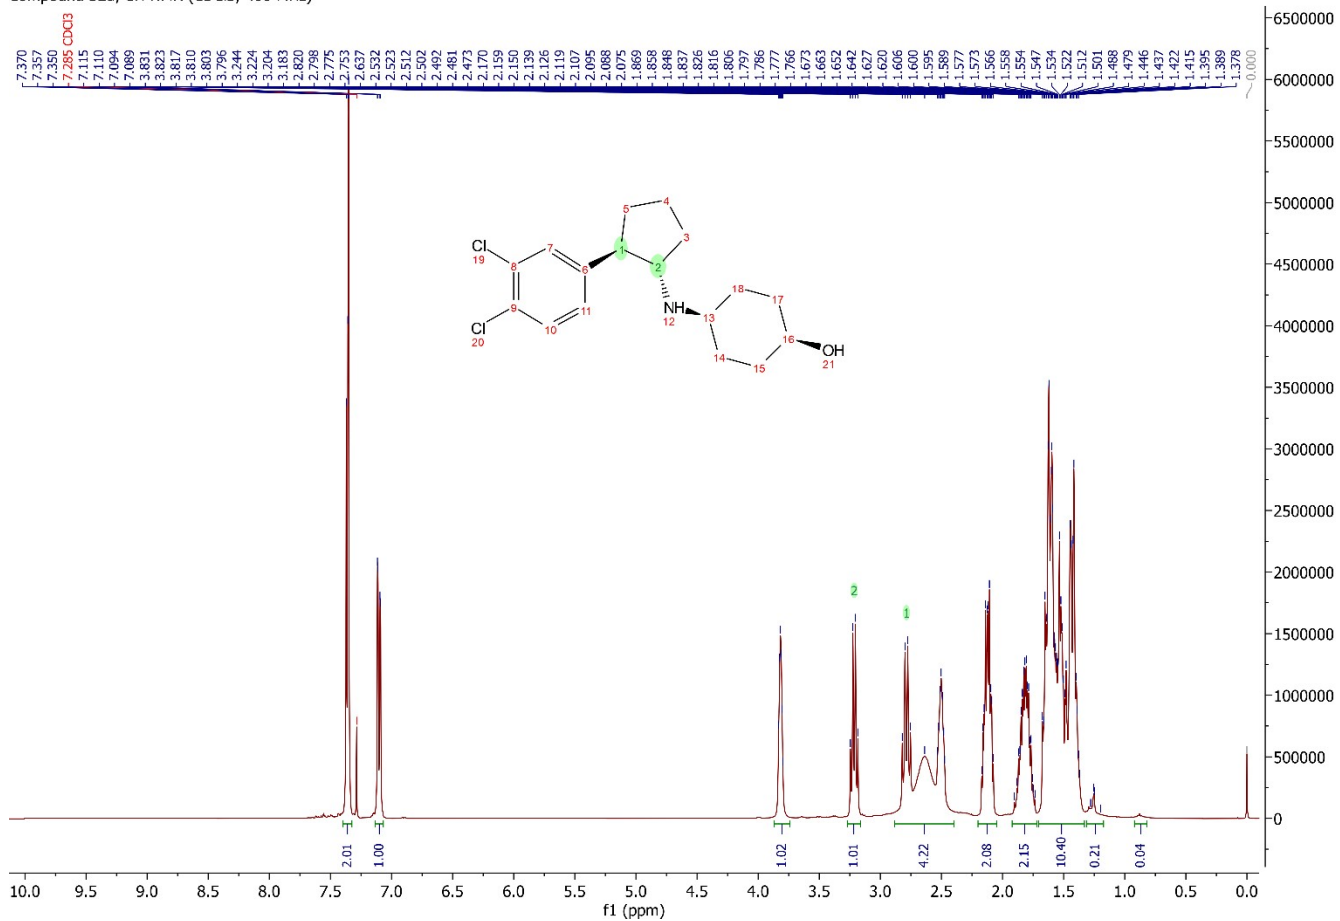

Compound 32d; <sup>13</sup>C NMR (CDCl<sub>3</sub>, 126 MHz)

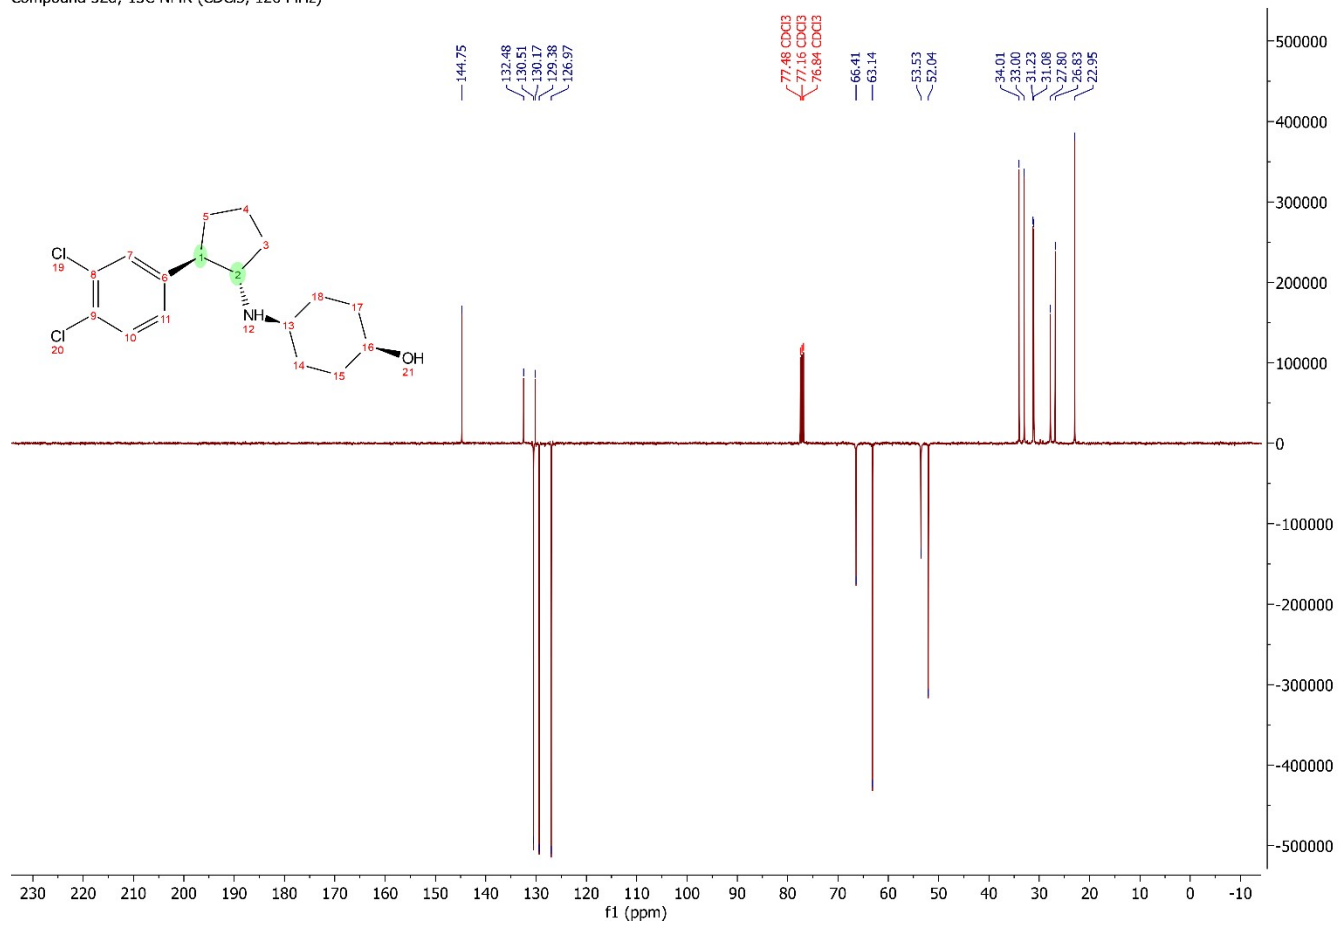



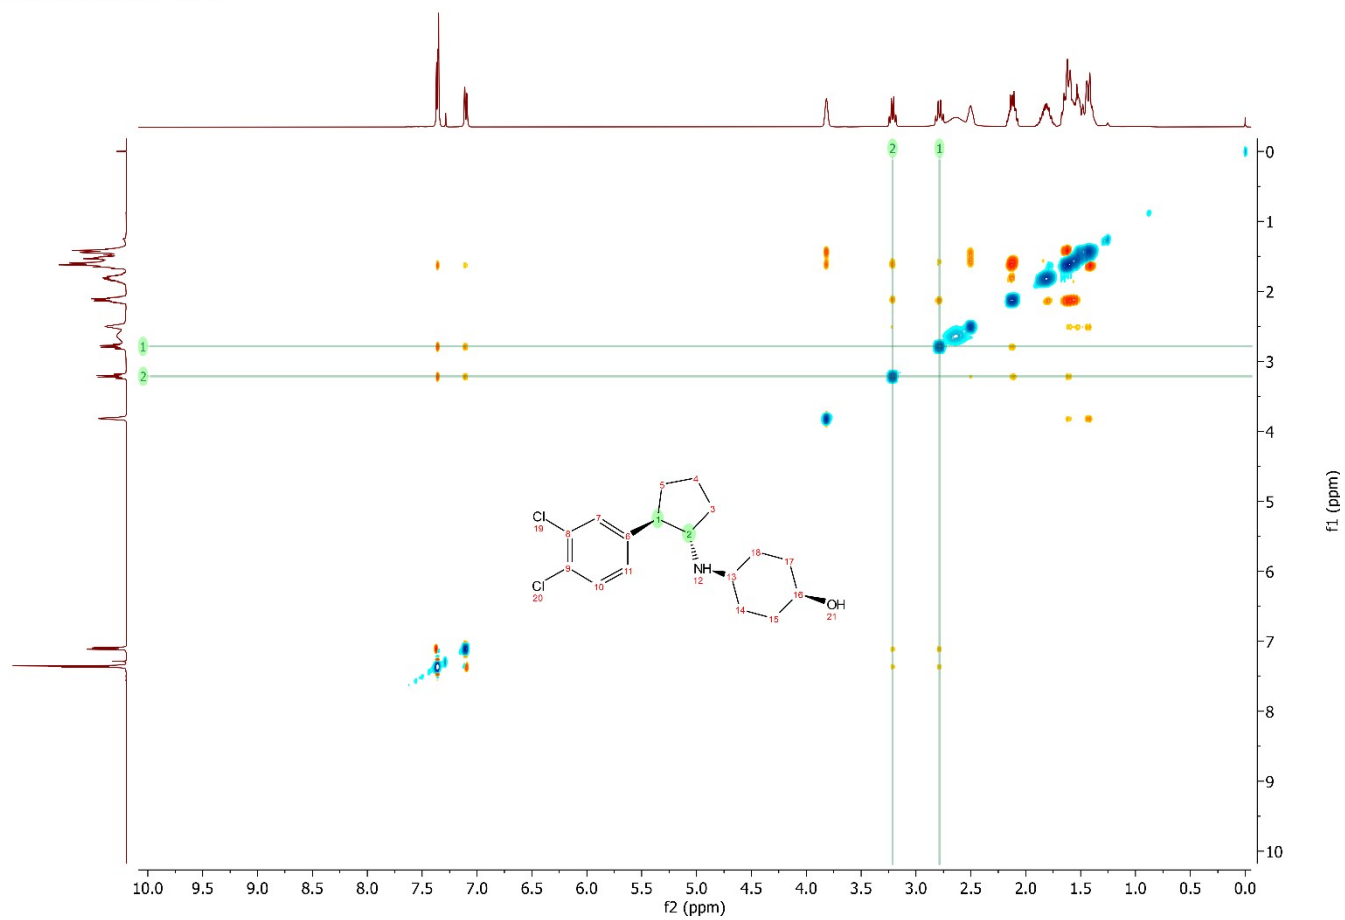

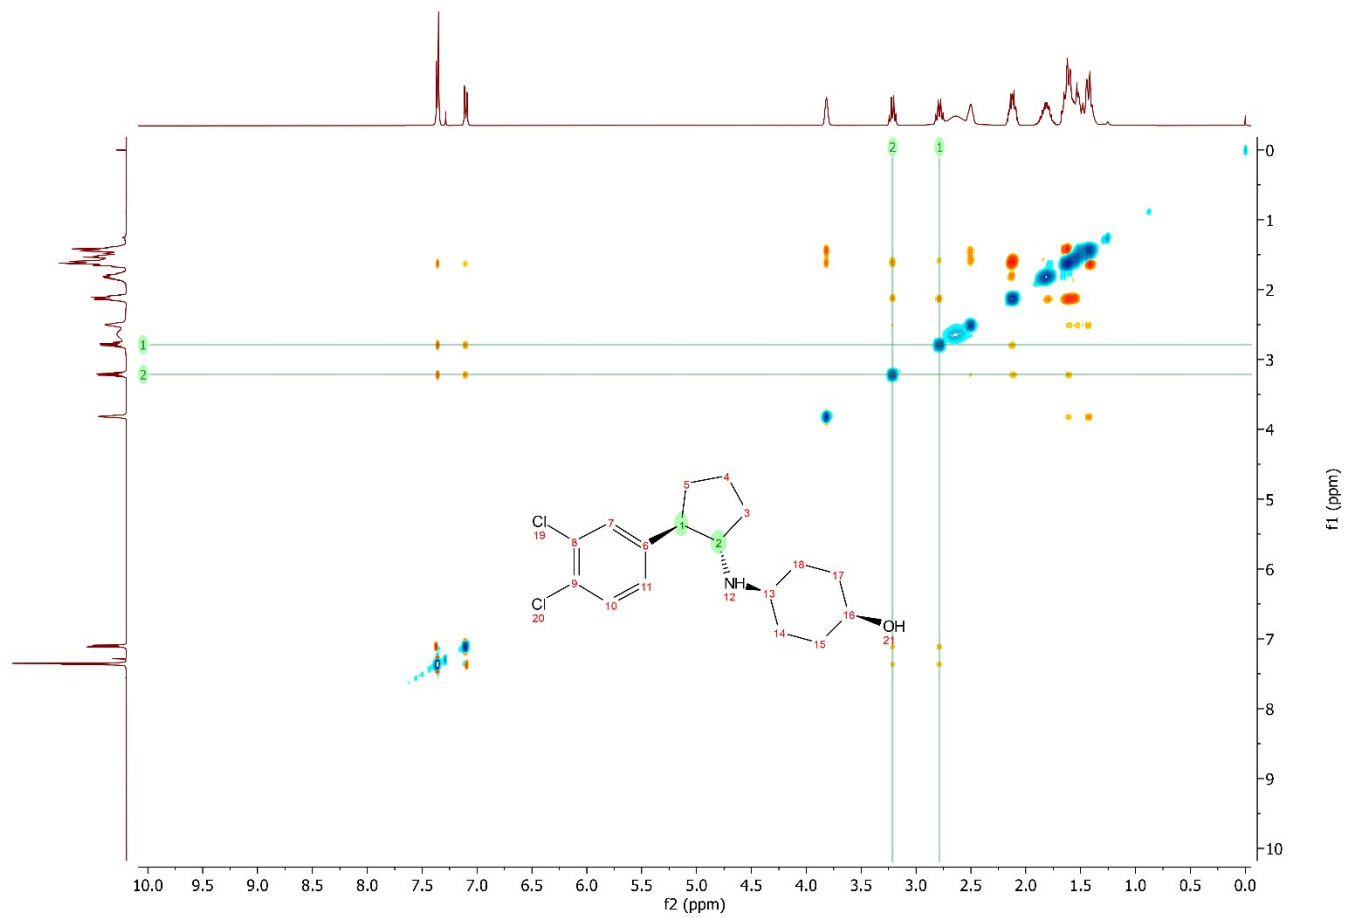

Compound 33a; <sup>1</sup>H NMR (CDCl<sub>3</sub>, 400 MHz)

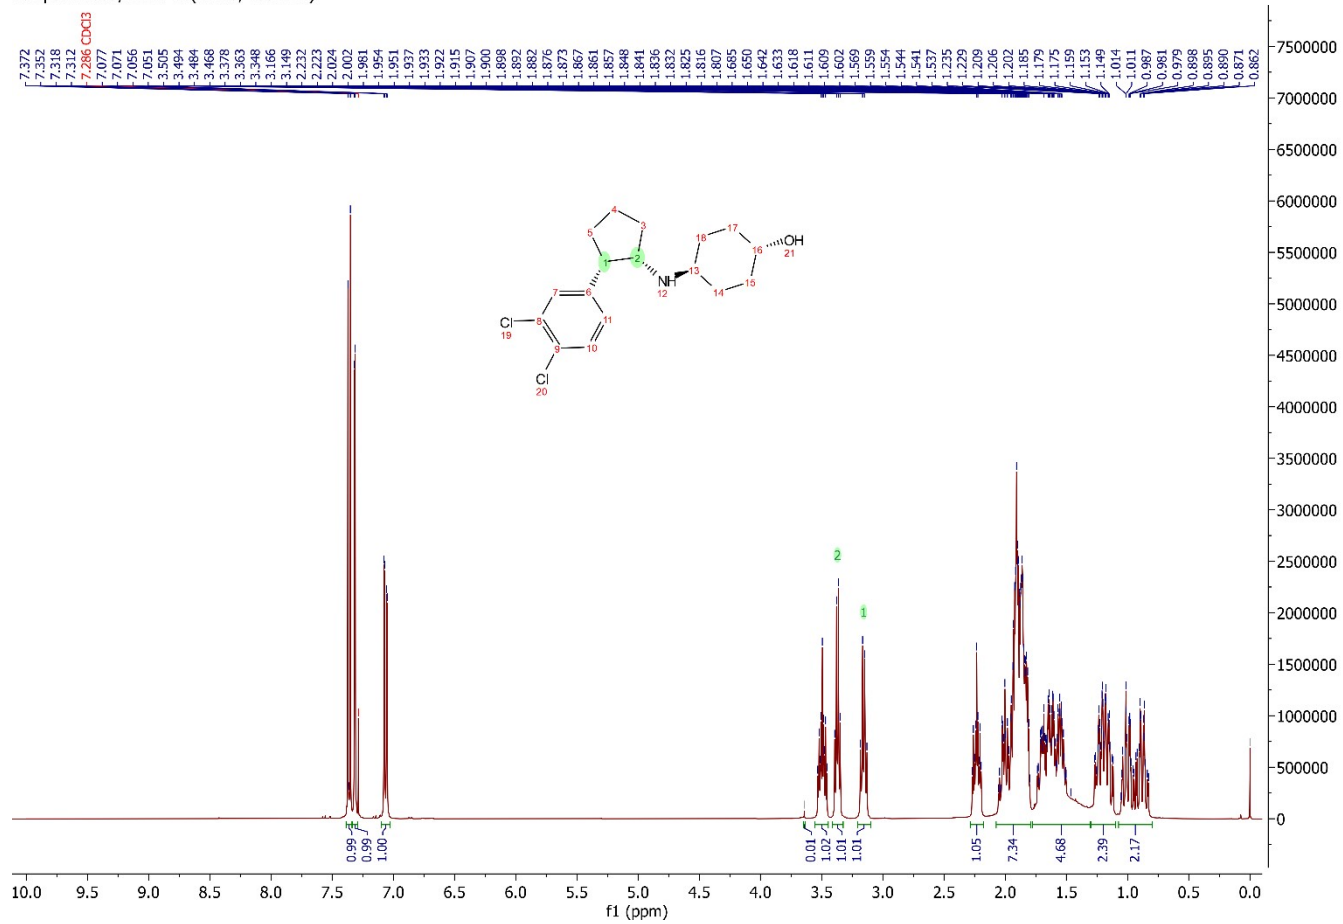

Compound 33a; <sup>13</sup>C NMR (CDCl<sub>3</sub>, 126 MHz)

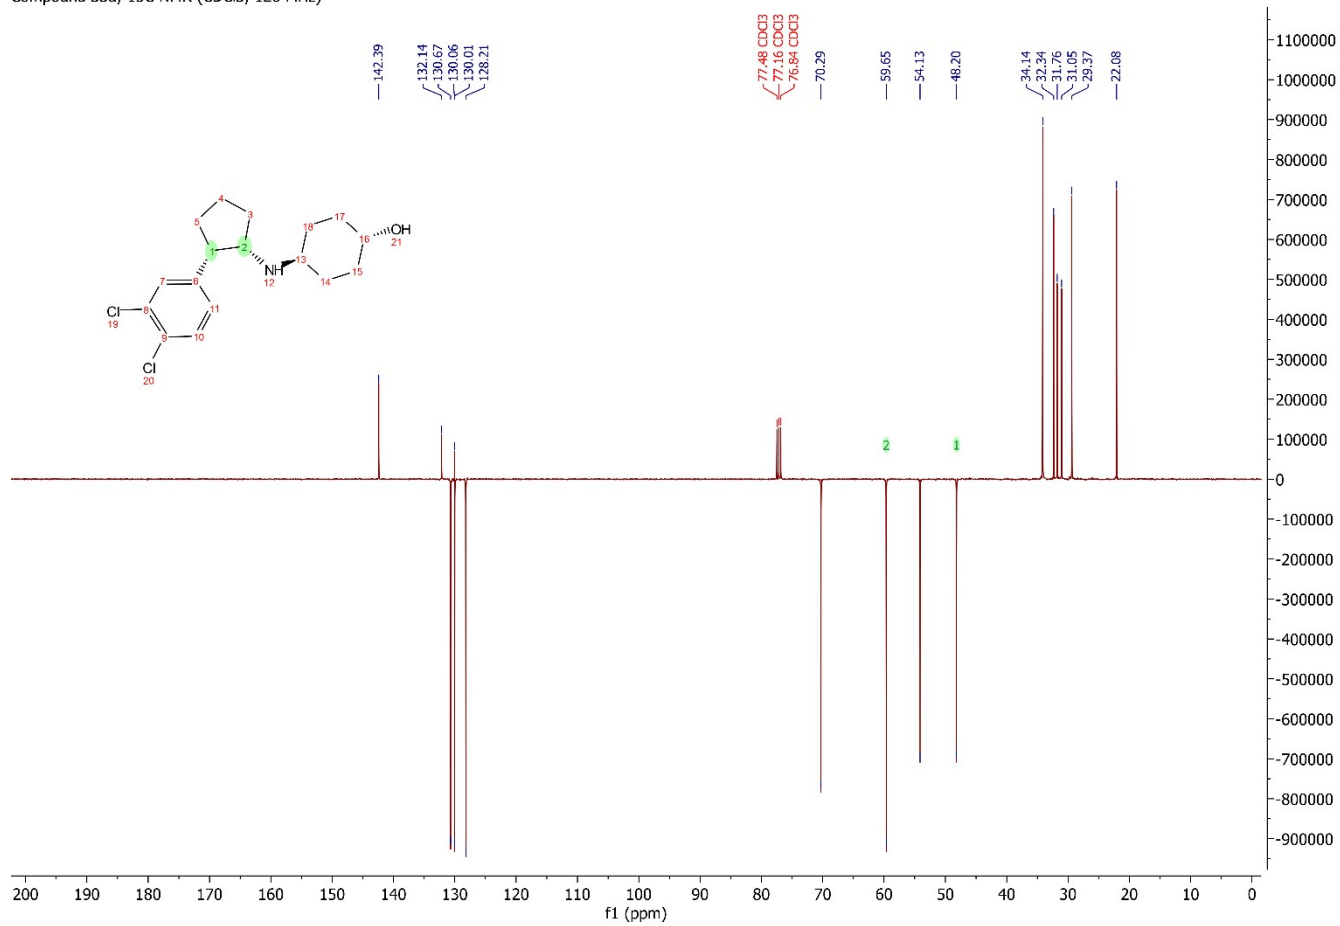

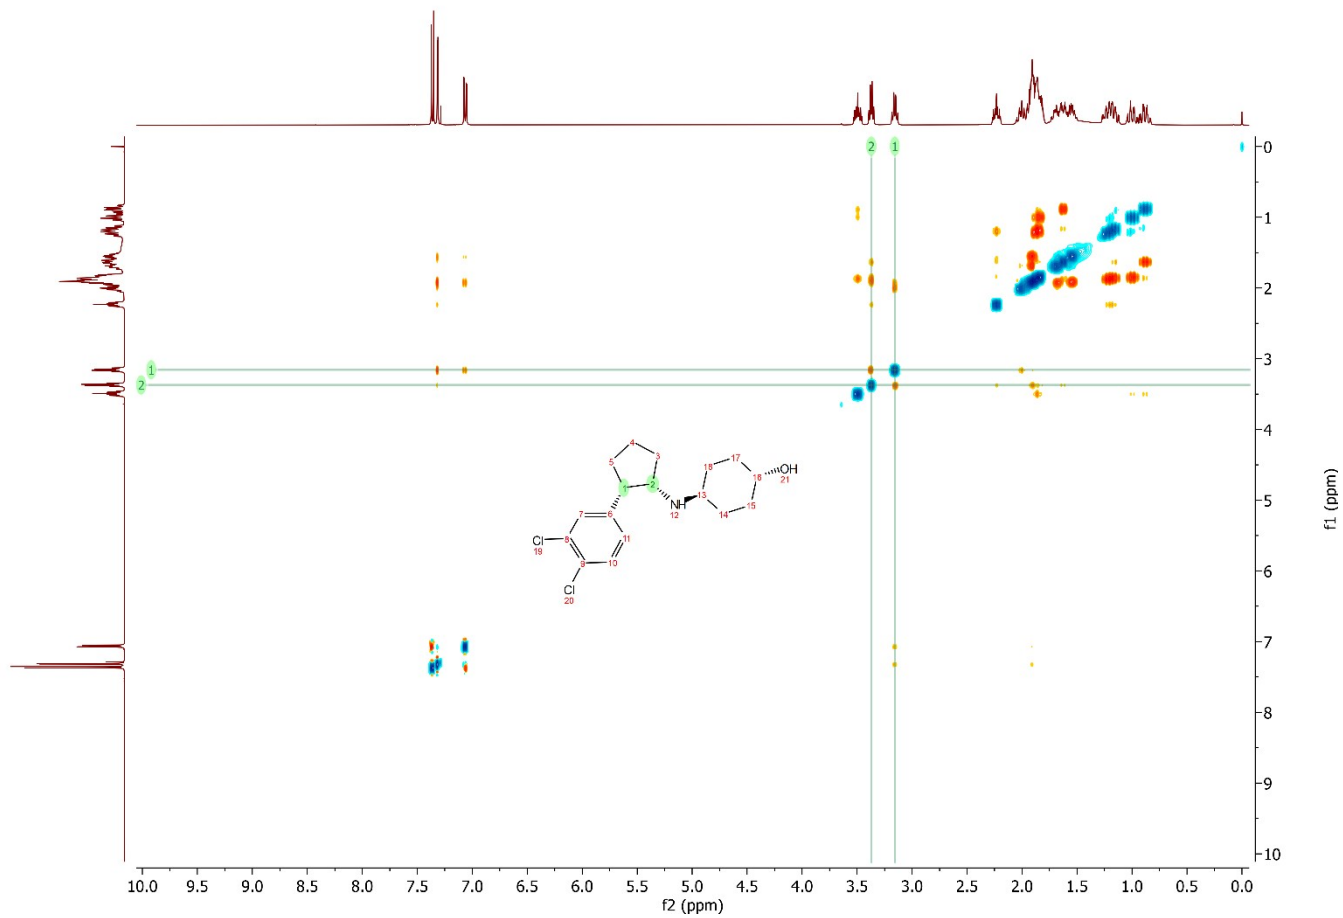

Compound 33b; 1H NMR (CDCl3, 400 MHz)

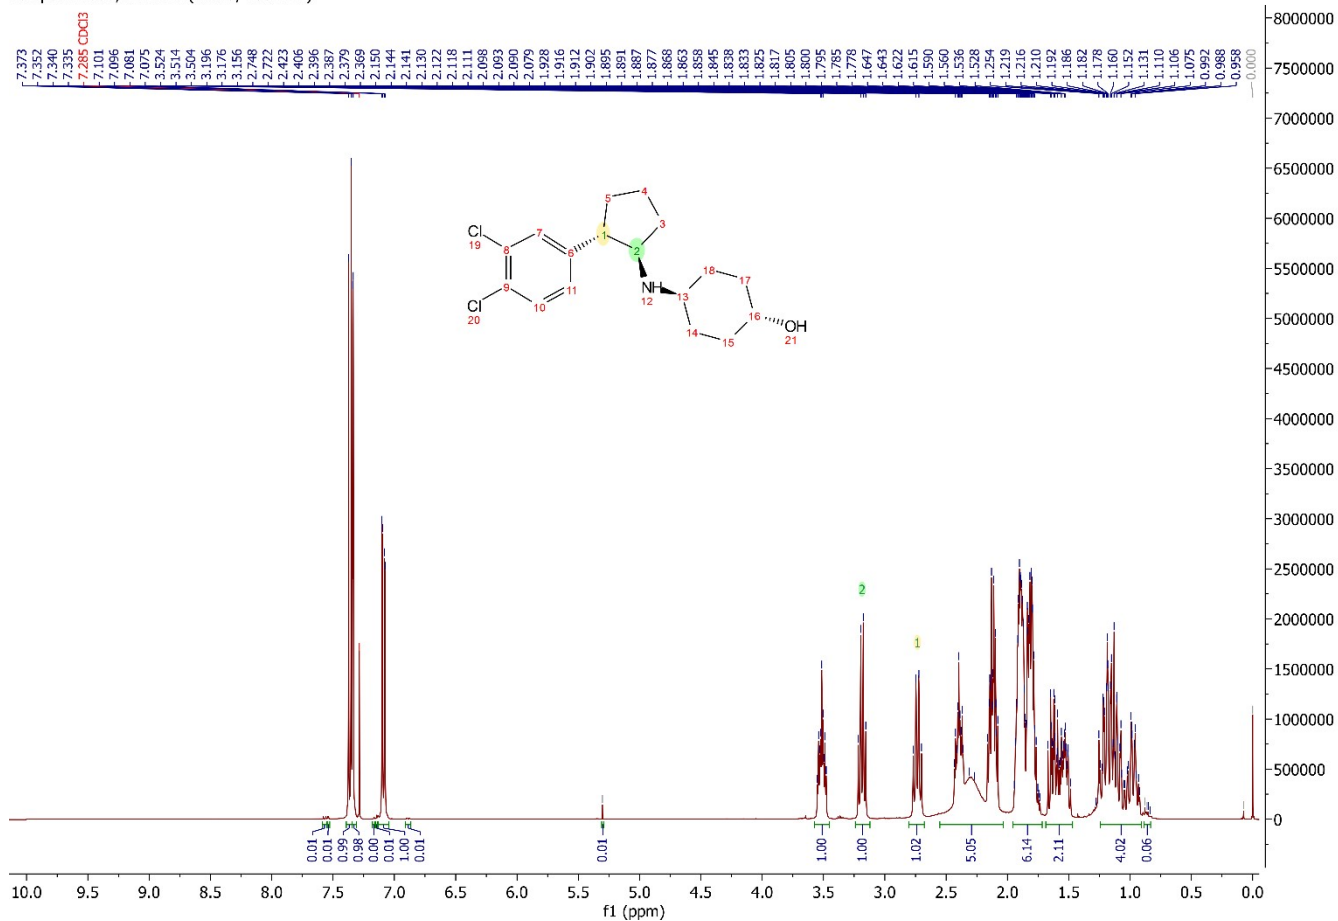

Compound 33b; <sup>13</sup>C NMR (CDCl<sub>3</sub>, 126 MHz)

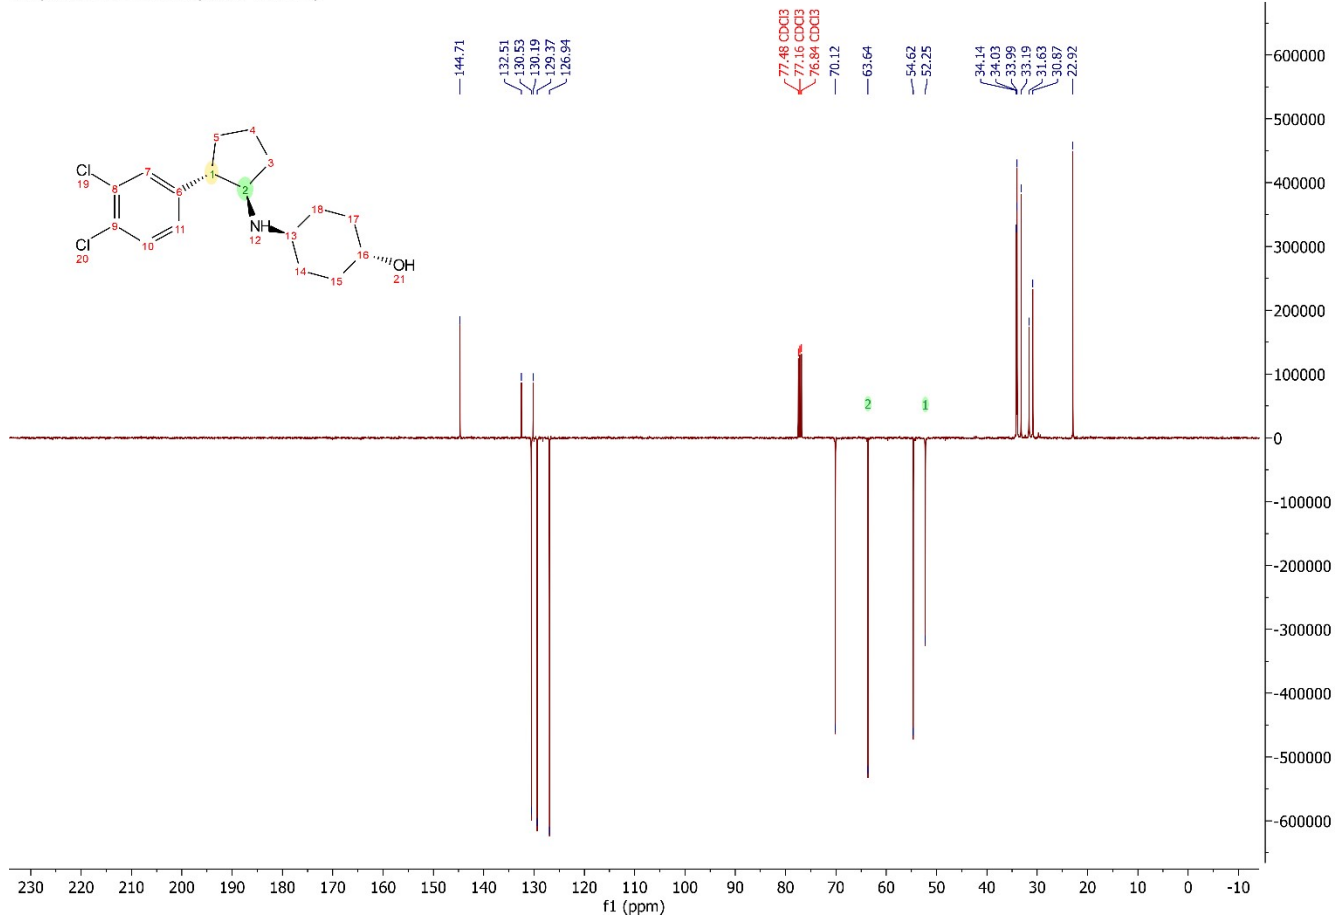

Compound 33b; NOESY (CDCl<sub>3</sub>)

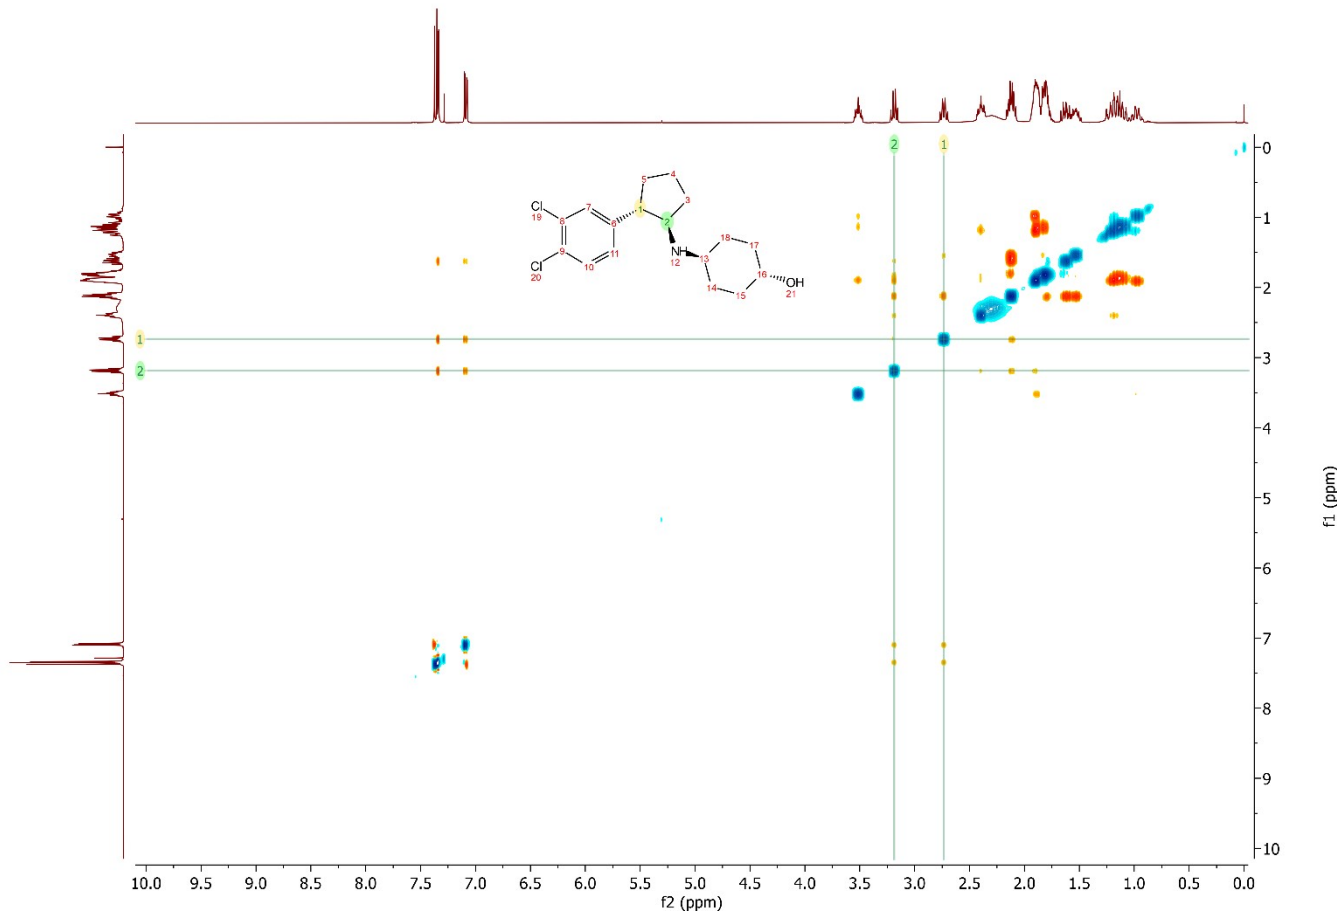

Compound 33c; <sup>1</sup>H NMR (CDCl<sub>3</sub>, 400 MHz)

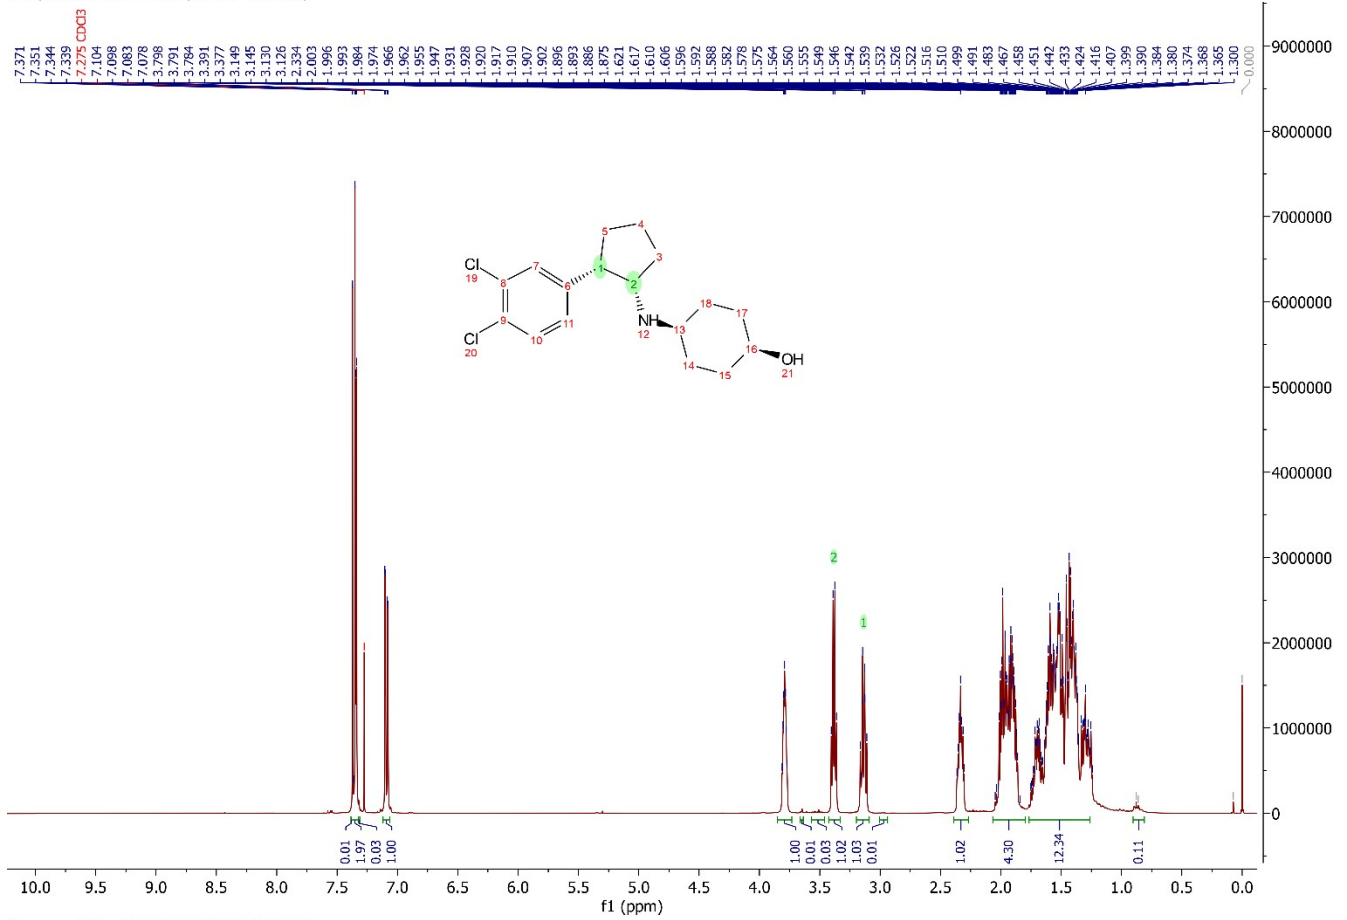

Compound 33c; <sup>13</sup>C NMR (CDCl<sub>3</sub>, 126 MHz)

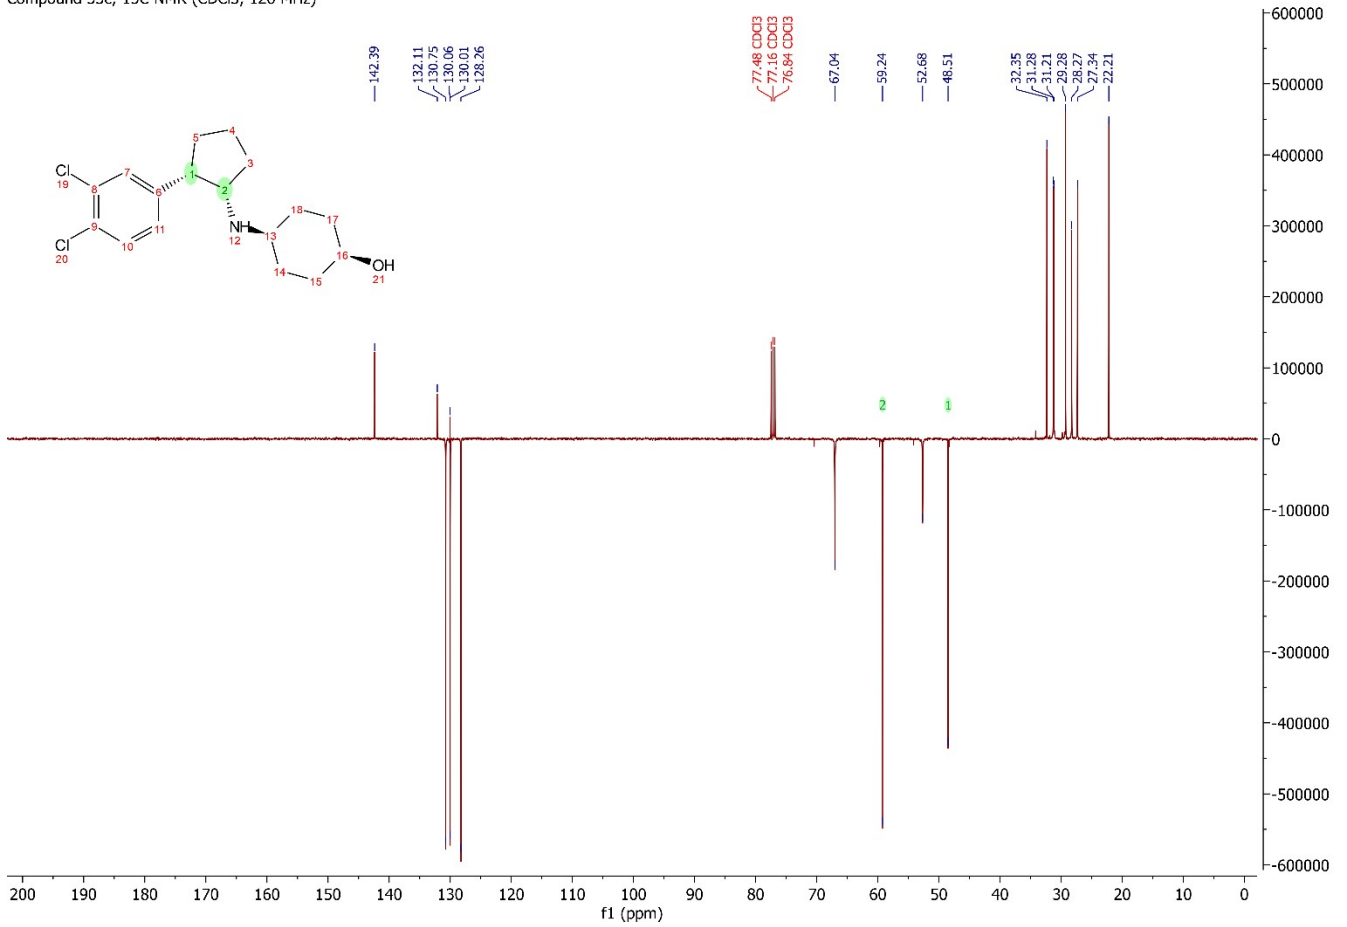



Compound 33c; NOESY (CDCl3)

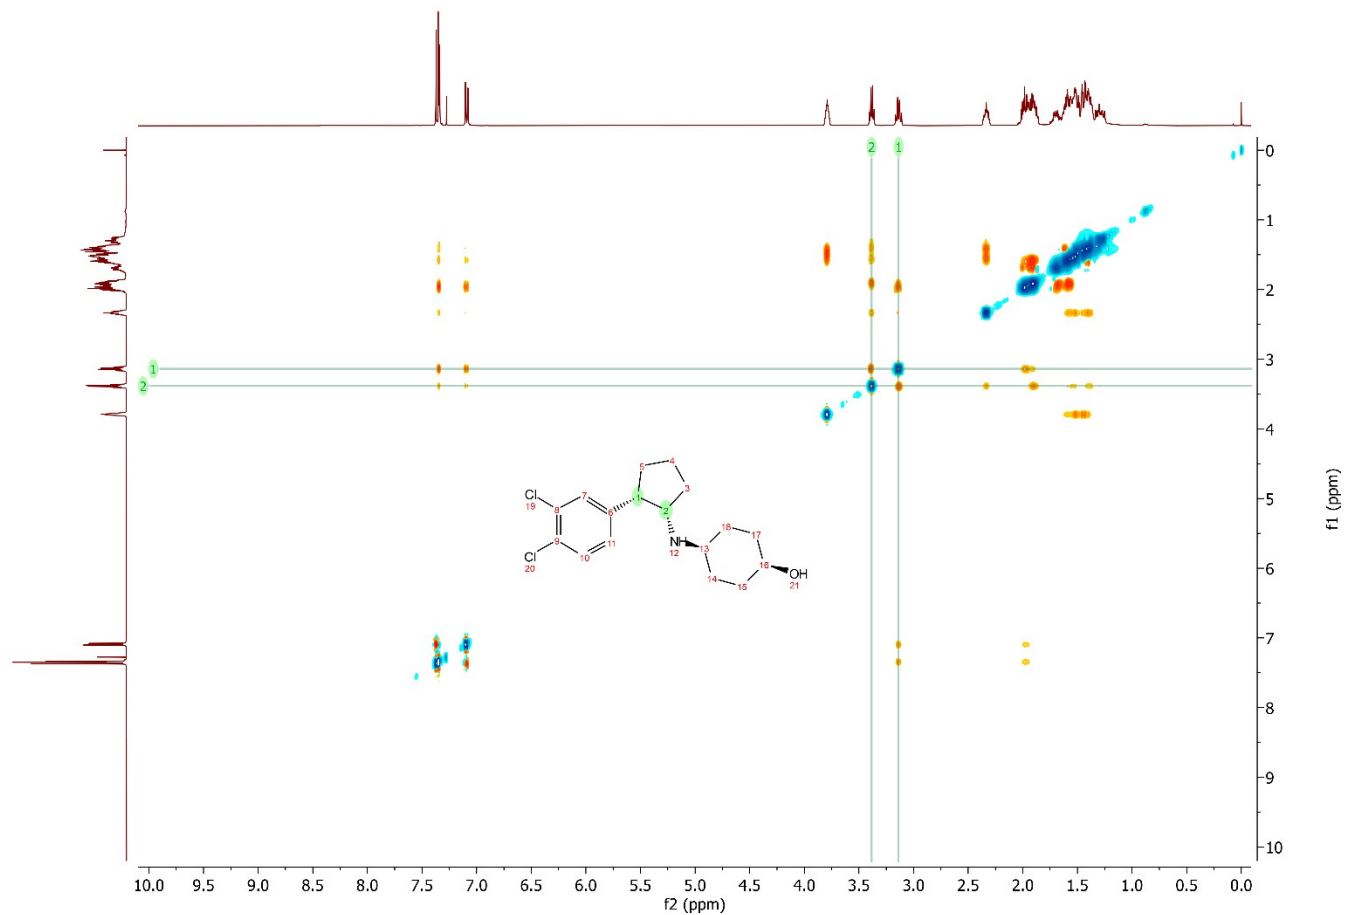

Compound 33d; 1H NMR (CDCl3, 400 MHz)

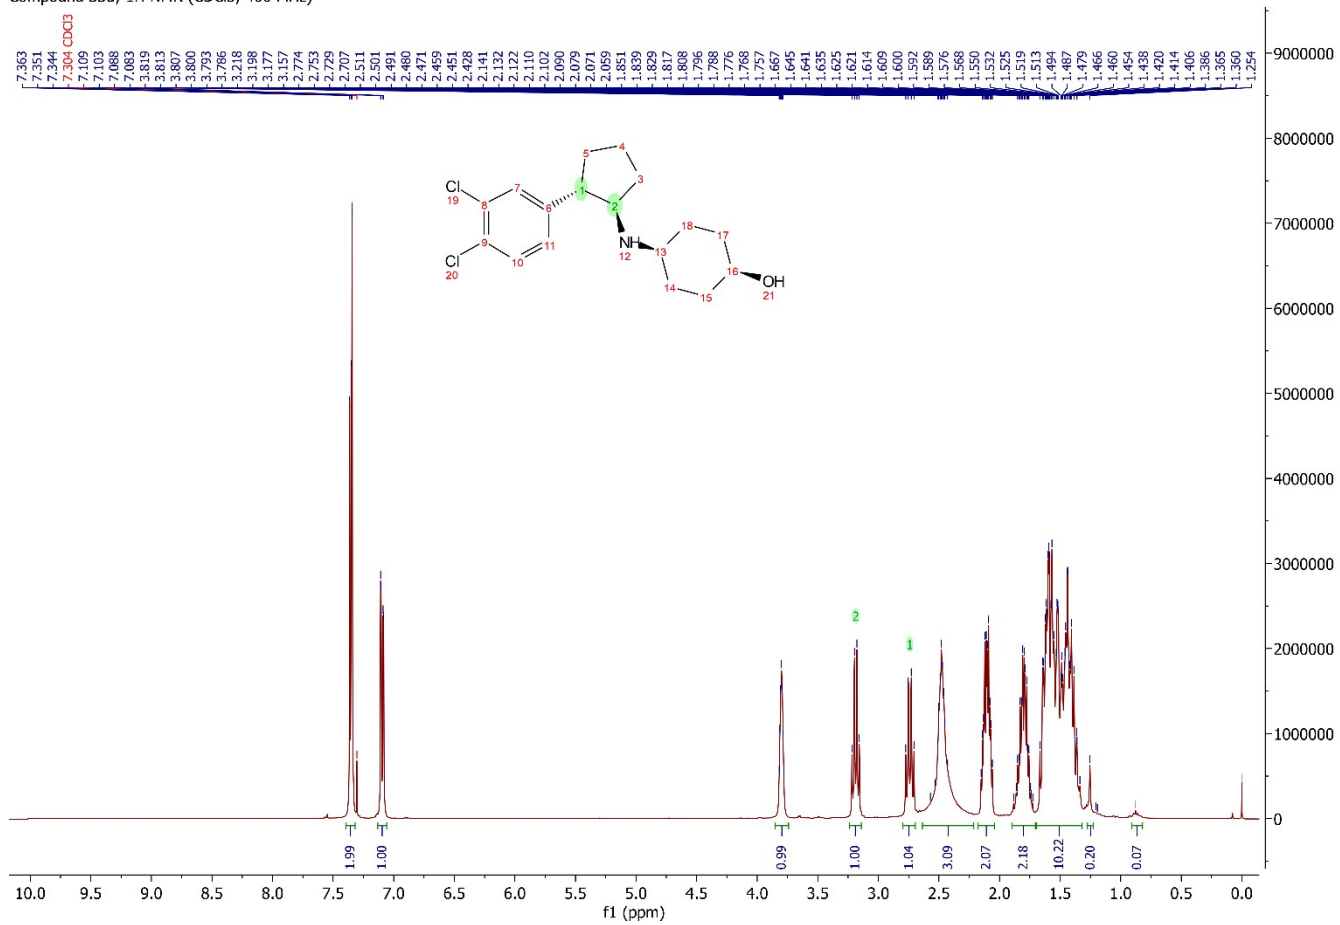

Compound 33d; <sup>13</sup>C NMR (CDCl<sub>3</sub>, 126 MHz)

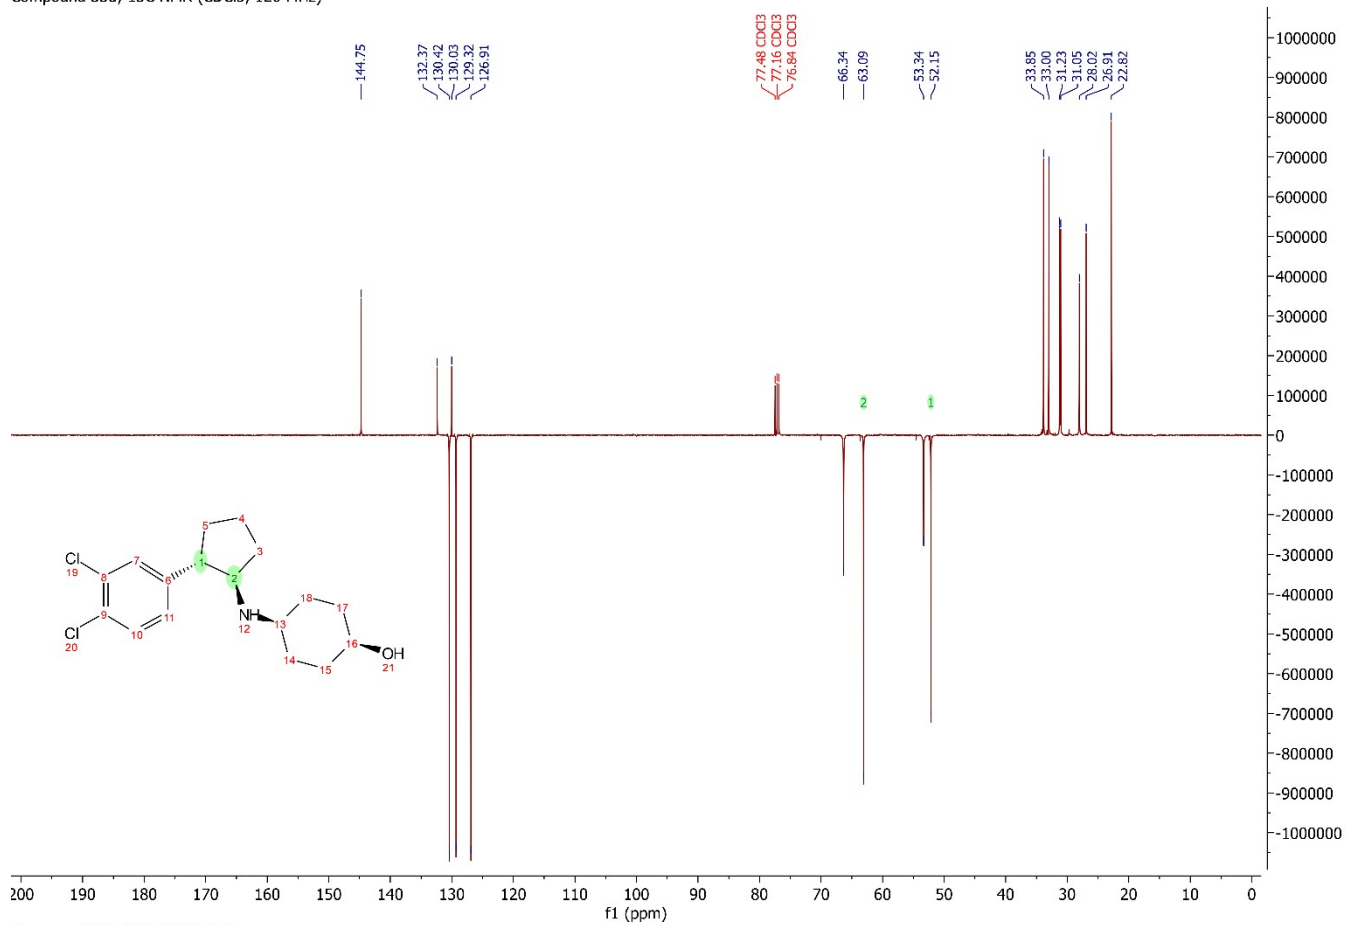

Compound 33d; NOESY (CDCl<sub>3</sub>)

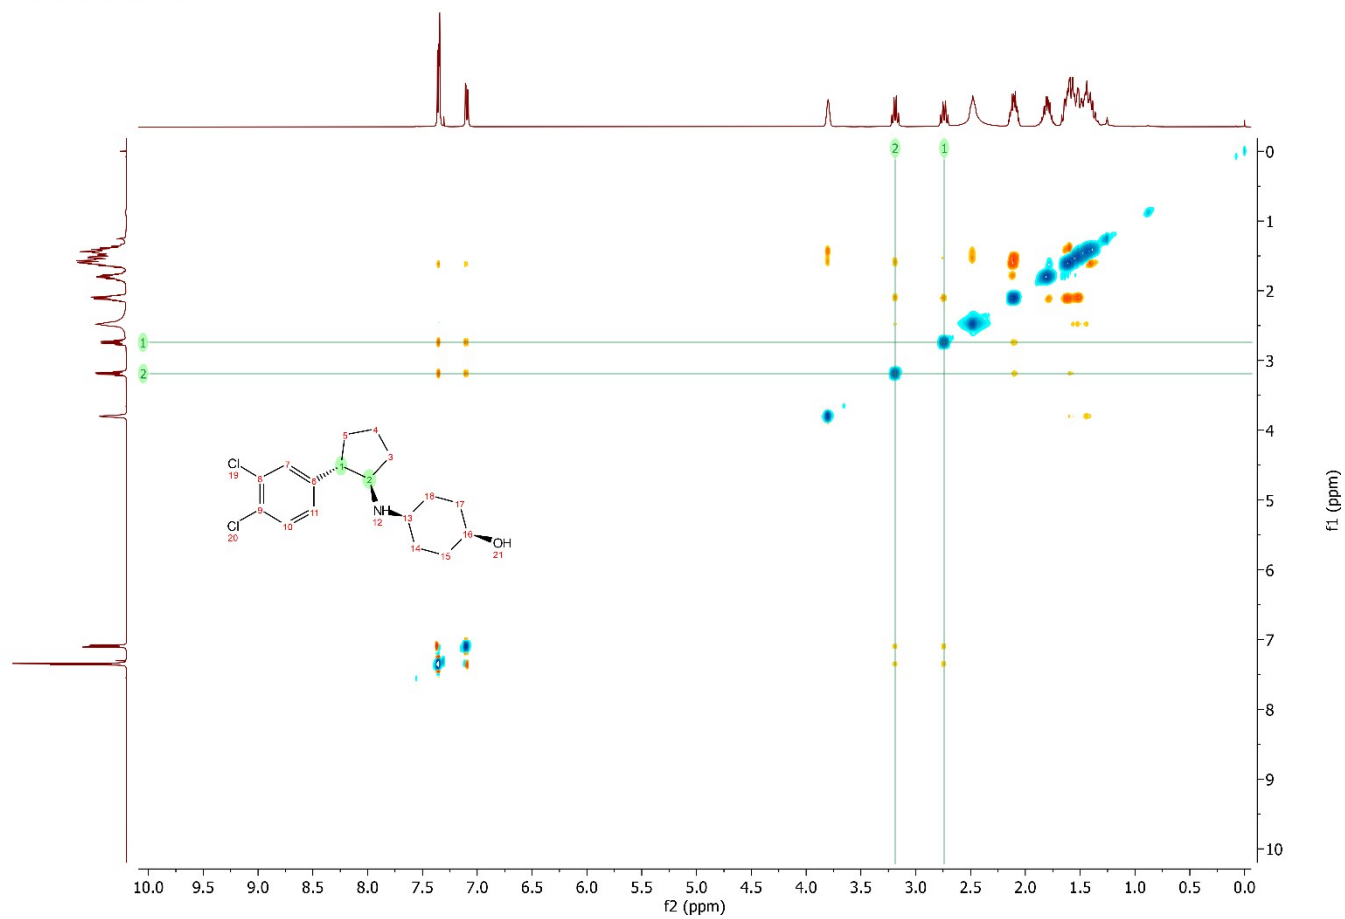

==== Shimadzu LabSolutions Browser Report ====

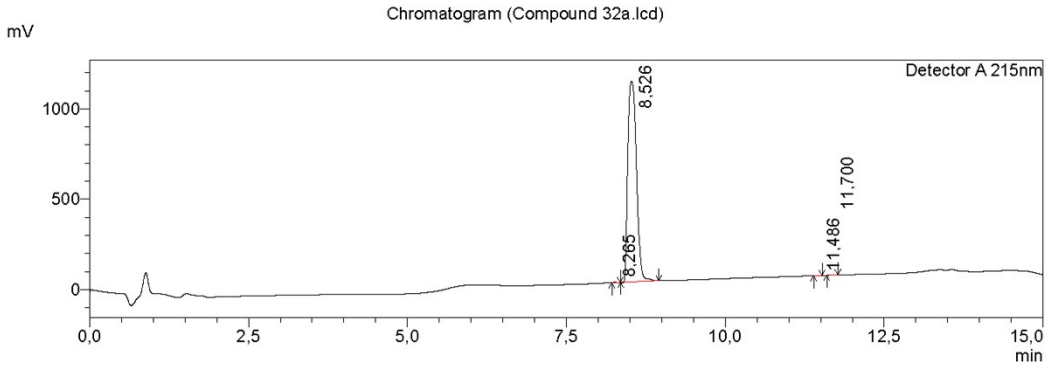

Peak Table (Compound 32a.lcd)

| Peak# | Ret. Time | Area     | Height  | Mark | Conc.   | Area%   |
|-------|-----------|----------|---------|------|---------|---------|
| 1     | 8,265     | 8401     | 2089    | M    | 0,080   | 0,080   |
| 2     | 8,526     | 10443769 | 1110104 | M    | 99,737  | 99,737  |
| 3     | 11,486    | 4783     | 831     | M    | 0,046   | 0,046   |
| 4     | 11,700    | 14387    | 2818    | M    | 0,137   | 0,137   |
| Total |           | 10471341 | 1115843 |      | 100,000 | 100,000 |

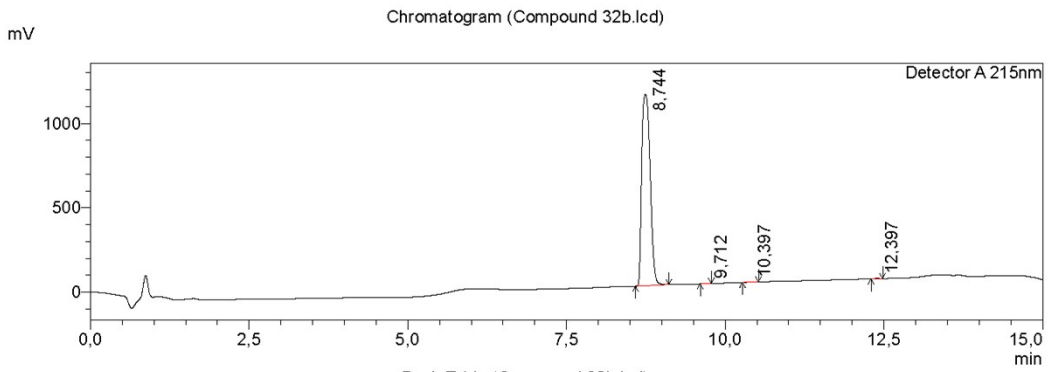

Peak Table (Compound 32b.lcd)

| Peak# | Ret. Time | Area     | Height  | Mark | Conc.   | Area%   |
|-------|-----------|----------|---------|------|---------|---------|
| 1     | 8,744     | 10511737 | 1133982 | M    | 99,632  | 99,632  |
| 2     | 9,712     | 10336    | 1902    | M    | 0,098   | 0,098   |
| 3     | 10,397    | 16594    | 2688    | M    | 0,157   | 0,157   |
| 4     | 12,397    | 11926    | 2117    | M    | 0,113   | 0,113   |
| Total |           | 10550593 | 1140689 |      | 100,000 | 100,000 |

# ==== Shimadzu LabSolutions Browser Report ====

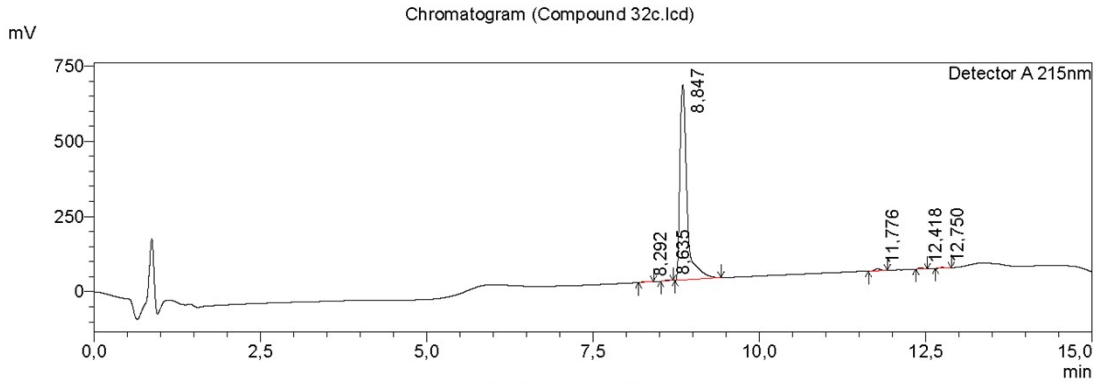

Peak Table (Compound 32c.lcd)

| Peak# | Ret. Time | Area    | Height | Mark | Conc.   | Area%   |
|-------|-----------|---------|--------|------|---------|---------|
| 1     | 8,292     | 10465   | 1556   | M    | 0,217   | 0,217   |
| 2     | 8,635     | 15835   | 2741   | M    | 0,328   | 0,328   |
| 3     | 8,847     | 4725232 | 648387 | M    | 97,981  | 97,981  |
| 4     | 11,776    | 36523   | 6622   | M    | 0,757   | 0,757   |
| 5     | 12,418    | 22949   | 4405   | M    | 0,476   | 0,476   |
| 6     | 12,750    | 11599   | 2393   | M    | 0,241   | 0,241   |
| Total |           | 4822603 | 666104 |      | 100,000 | 100,000 |

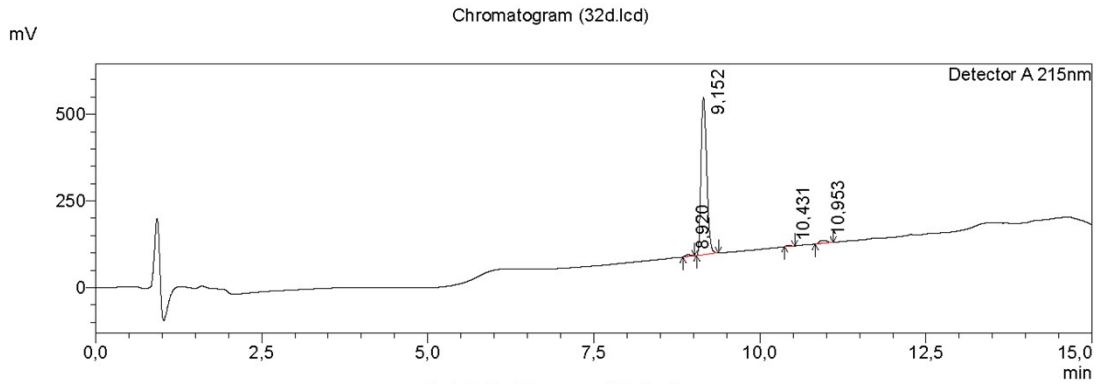

Peak Table (Compound 32d.lcd)

| Peak# | Ret. Time | Area    | Height | Mark | Conc.   | Area%   |
|-------|-----------|---------|--------|------|---------|---------|
| 1     | 8,920     | 29000   | 5216   | M    | 1,046   | 1,046   |
| 2     | 9,152     | 2670648 | 455320 | M    | 96,346  | 96,346  |
| 3     | 10,431    | 9245    | 1948   | M    | 0,334   | 0,334   |
| 4     | 10,953    | 63031   | 8473   | M    | 2,274   | 2,274   |
| Total |           | 2771924 | 470957 |      | 100,000 | 100,000 |

# ==== Shimadzu LabSolutions Browser Report ====

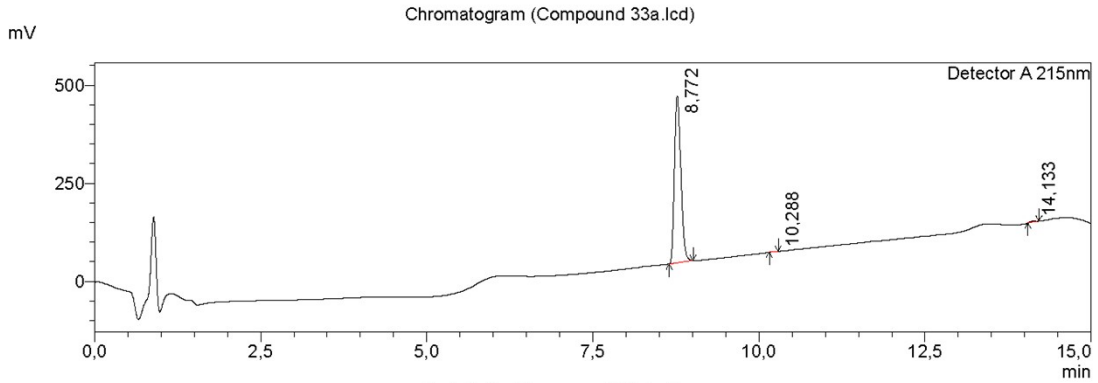

Peak Table (Compound 33a.lcd)

| Peak# | Ret. Time | Area    | Height | Mark | Conc.   | Area%   |
|-------|-----------|---------|--------|------|---------|---------|
| 1     | 8,772     | 2869474 | 425621 | M    | 99,307  | 99,307  |
| 2     | 10,288    | 3954    | 31     | M    | 0,137   | 0,137   |
| 3     | 14,133    | 16084   | 2554   | M    | 0,557   | 0,557   |
| Total |           | 2889512 | 428206 |      | 100,000 | 100,000 |

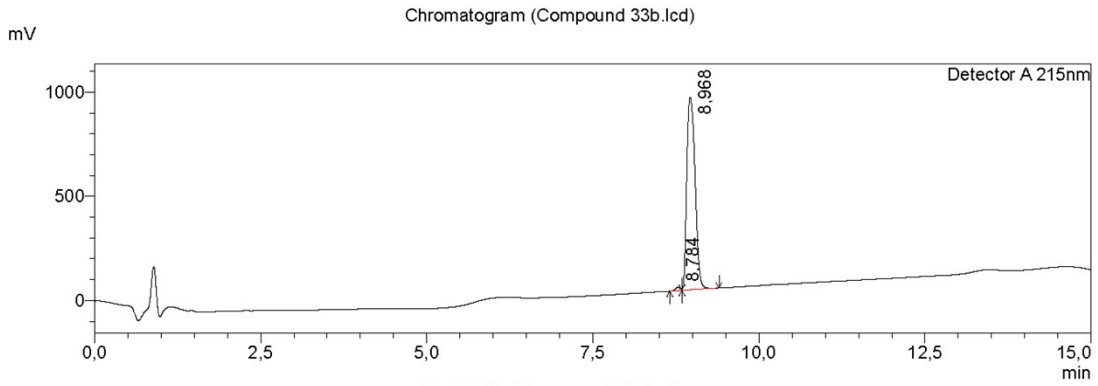

Peak Table (Compound 33b.lcd)

| Peak# | Ret. Time | Area    | Height | Mark | Conc.   | Area%   |
|-------|-----------|---------|--------|------|---------|---------|
| 1     | 8,784     | 90877   | 16744  | M    | 1,123   | 1,123   |
| 2     | 8,968     | 8001614 | 926334 | V M  | 98,877  | 98,877  |
| Total |           | 8092492 | 943077 |      | 100,000 | 100,000 |

# ==== Shimadzu LabSolutions Browser Report ====

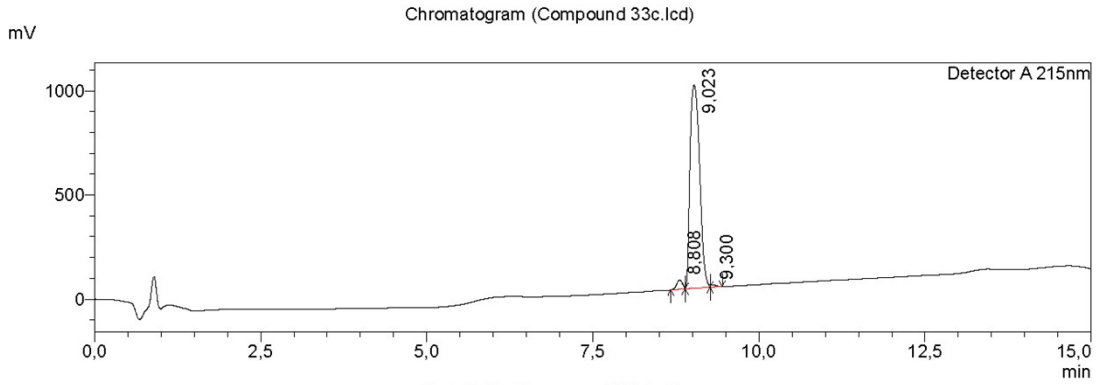

Peak Table (Compound 33c.lcd)

| Peak# | Ret. Time | Area     | Height  | Mark | Conc.   | Area%   |
|-------|-----------|----------|---------|------|---------|---------|
| 1     | 8,808     | 266041   | 43158   | M    | 2,632   | 2,632   |
| 2     | 9,023     | 9773699  | 977836  | V M  | 96,710  | 96,710  |
| 3     | 9,300     | 66427    | 12362   | V M  | 0,657   | 0,657   |
| Total |           | 10106167 | 1033356 |      | 100,000 | 100,000 |

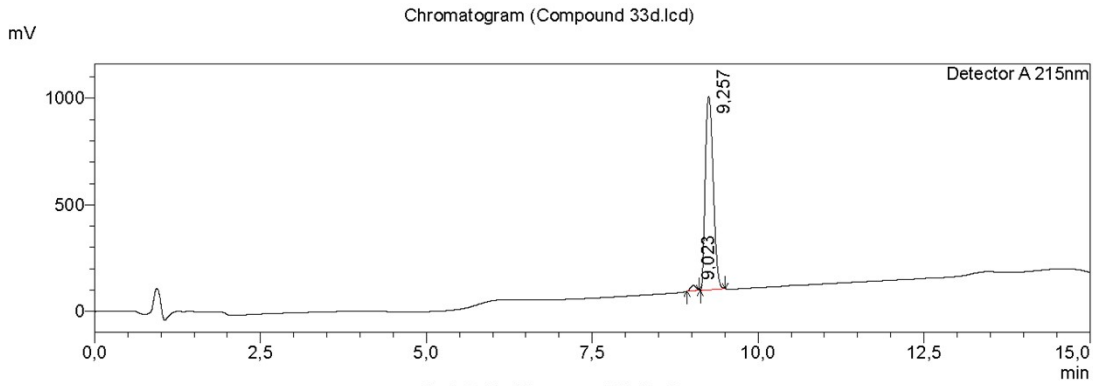

Peak Table (Compound 33d.lcd)

| Peak# | Ret. Time | Area    | Height | Mark | Conc.   | Area%   |
|-------|-----------|---------|--------|------|---------|---------|
| 1     | 9,023     | 139240  | 25461  | M    | 1,808   | 1,808   |
| 2     | 9,257     | 7559980 | 906469 | M    | 98,192  | 98,192  |
| Total |           | 7699219 | 931929 |      | 100,000 | 100,000 |
